# Supplementary material
Source: MDPI journal article supplement (https://www.mdpi.com/2304-6740/11/5/198)
Supplement: s1 [file s1]

## Supporting Information

# Pt(II) complexes with a novel pincer N<sup>^</sup>C<sup>^</sup>N ligand: synthesis, characterization, and photophysics

Evgeniia E. Luneva<sup>1</sup>, Daria O. Kozina<sup>1</sup>, Anna V. Mozzhukhina<sup>1</sup>, Vitaly V. Porsev<sup>1</sup>, Anastasia I. Solomatina<sup>1,\*</sup>, and Sergey P. Tunik<sup>1,\*</sup>

<sup>1</sup> Institute of Chemistry, St. Petersburg State University, Universitetskii av., 26, 198504 St. Petersburg, Russia; yevgeniyalunyova@gmail.com (E.E.L.); kozina.d@yandex.ru (D.O.K.); st101545@student.spbu.ru (A.V.M); v.porsev@spbu.ru (V.V.P.)

\* Correspondence: a.solomatina@spbu.ru (A.I.S.); sergey.tunik@spbu.ru (S.P.T)

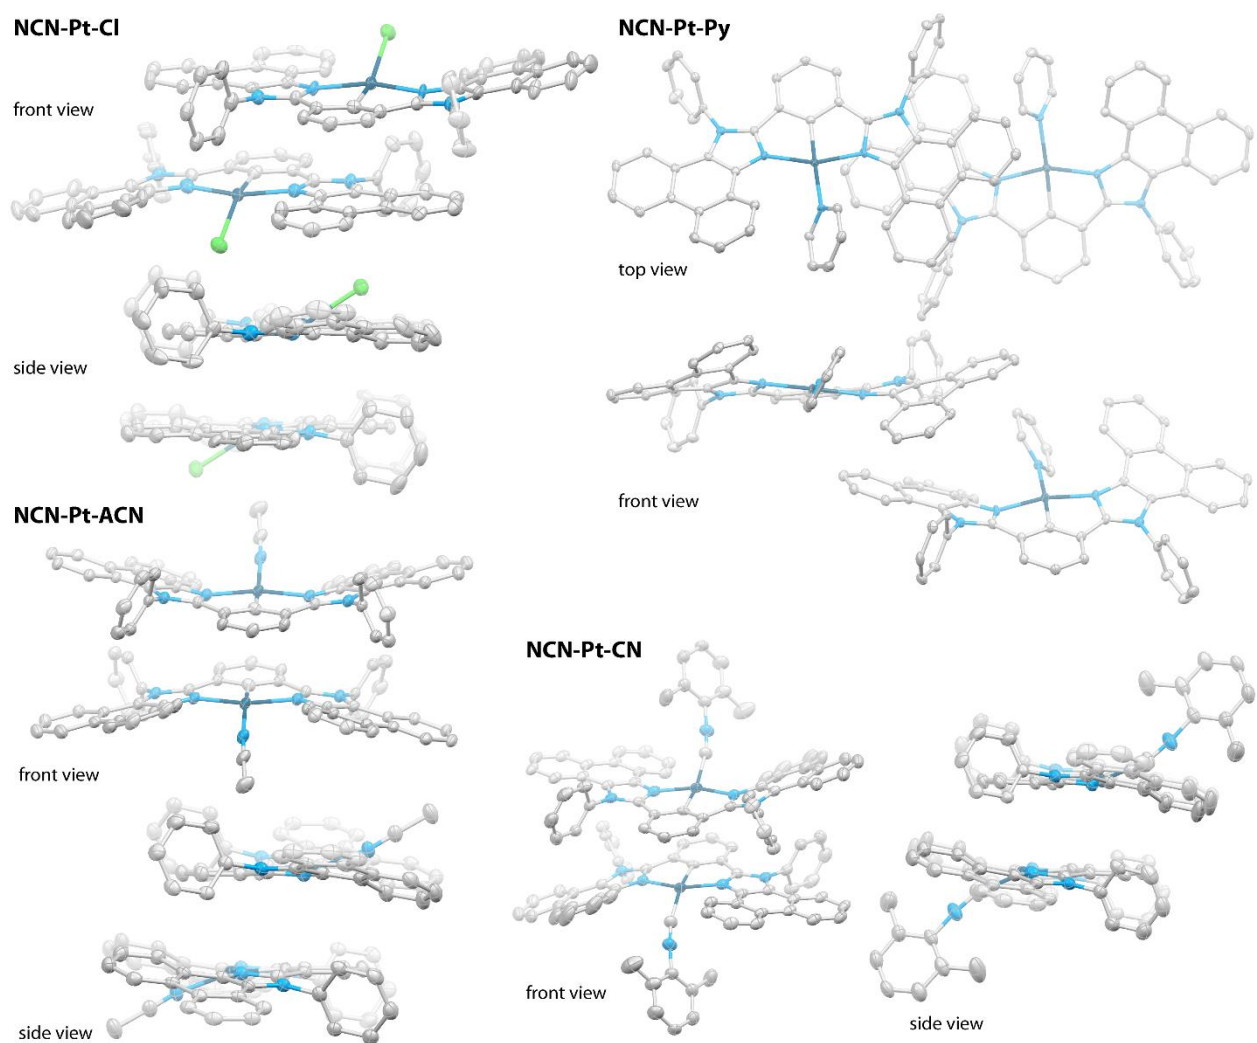

**Figure S1.** Packing of platinum complexes in solid state showing thermal ellipsoids at the 50% probability level. Hydrogen atoms and counterions are omitted for clarity.

**Table S1. Selected bond distances ( $\text{\AA}$ ) and angles ( $^\circ$ ).**

| 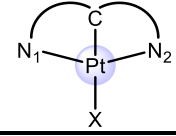 | NCN-Pt-Cl | NCN-Pt-ACN | NCN-Pt-Py  | NCN-Pt-CN  | Pt-Pt                     | Pt-Ag-Pt                                            |
|-----------------------------------------------------------------------------------|-----------|------------|------------|------------|---------------------------|-----------------------------------------------------|
| Distances, $\text{\AA}$                                                           |           |            |            |            |                           |                                                     |
| Pt-N1                                                                             | 2.056(10) | 2.063(4)   | 2.066(2)   | 2.048(3)   | 2.079(5)/<br>2.067(4)     | 2.056(10)/<br>2.083(8)                              |
| Pt-N2                                                                             | 2.082(9)  | 2.064(4)   | 2.071(3)   | 2.050(3)   | 2.042(5)/<br>2.115(5)     |                                                     |
| Pt-C                                                                              | 1.938(11) | 1.934(4)   | 1.961(3)   | 1.978(3)   | 1.935(6)/<br>1.942(6)     | 2.058(11)/<br>2.050(9),                             |
| Pt-X                                                                              | 2.419(3)  | 2.105(4)   | 2.127(2)   | 2.031(4)   | 2.186(4)/<br>2.134(4)     |                                                     |
| Pt-Pt                                                                             |           |            |            |            | 3.1396(3)                 |                                                     |
| Pt-Ag                                                                             |           |            |            |            |                           | 2.9762(9)/<br>2.9626(9),<br>2.9643(9)/<br>2.9926(9) |
| Angles, $^\circ$                                                                  |           |            |            |            |                           |                                                     |
| C-Pt-X                                                                            | 156.1(3)  | 163.53(17) | 177.55(12) | 160.32(17) | 167.9(2)/<br>176.0(2)     |                                                     |
| N1-Pt-C                                                                           | 80.9(4)   | 81.09(16)  | 79.80(12)  | 79.61(14)  | 80.1(2)/<br>80.0(2)       |                                                     |
| N2-Pt-C                                                                           | 80.0(4)   | 78.89(16)  | 79.35(12)  | 79.52(13)  | 80.5(2)/<br>80.4(2)       |                                                     |
| N1-Pt-X                                                                           | 98.0(3)   | 100.29(14) | 98.05(10)  | 99.16(14)  | 106.31(17)/<br>96.27(17)  |                                                     |
| N2-Pt-X                                                                           | 101.6(2)  | 99.74(14)  | 102.77(10) | 101.43(14) | 94.86(17)/<br>103.44(18)  |                                                     |
| N1-Pt-N2                                                                          | 160.2(3)  | 159.76(15) | 159.11(10) | 158.94(12) | 157.61(19)/<br>159.64(19) |                                                     |
| C-Pt1-Pt2                                                                         |           |            |            |            | 95.08(16)                 |                                                     |
| Pt1-Pt2-C'                                                                        |           |            |            |            | 102.97(16)                |                                                     |

**Table S2. Crystallographic data for platinum complexes.**

| Compound                                          | NCN-Pt-Cl                                           | NCN-Pt-ACN                                                            | NCN-Pt-Py                                                                         | NCN-Pt-CN                                                         | Pt-Pt                                                                                          | Pt-Ag-Pt                                                                                               |
|---------------------------------------------------|-----------------------------------------------------|-----------------------------------------------------------------------|-----------------------------------------------------------------------------------|-------------------------------------------------------------------|------------------------------------------------------------------------------------------------|--------------------------------------------------------------------------------------------------------|
| Formula                                           | C <sub>48</sub> H <sub>29</sub> ClN <sub>4</sub> Pt | C <sub>56</sub> H <sub>42.74</sub> F <sub>6</sub> N <sub>6</sub> OPPt | C <sub>55</sub> H <sub>38</sub> Cl <sub>4</sub> F <sub>6</sub> N <sub>5</sub> PPt | C <sub>57</sub> H <sub>38</sub> F <sub>6</sub> N <sub>5</sub> PPt | C <sub>102</sub> H <sub>69</sub> F <sub>6</sub> N <sub>8</sub> O <sub>4</sub> PPt <sub>2</sub> | C <sub>132</sub> H <sub>94</sub> AgF <sub>16.5</sub> N <sub>12</sub> P <sub>2.75</sub> Pt <sub>2</sub> |
| Crystal System                                    | Orthorhombic                                        | Monoclinic                                                            | Monoclinic                                                                        | Monoclinic                                                        | Triclinic                                                                                      | Triclinic                                                                                              |
| <i>a</i> (Å)                                      | 15.3721(2)                                          | 20.8432(2)                                                            | 22.0458(2)                                                                        | 16.9422(2)                                                        | 17.4175(2)                                                                                     | 17.4754(3)                                                                                             |
| <i>b</i> (Å)                                      | 17.0053(2)                                          | 29.6127(3)                                                            | 9.63000(10)                                                                       | 17.69520(10)                                                      | 17.4217(3)                                                                                     | 24.8036(5)                                                                                             |
| <i>c</i> (Å)                                      | 30.0534(3)                                          | 17.6765(2)                                                            | 23.7845(2)                                                                        | 18.3812(2)                                                        | 17.9119(2)                                                                                     | 28.7013(4)                                                                                             |
| $\alpha$ (°)                                      | 90                                                  | 90                                                                    | 90                                                                                | 90                                                                | 88.0990(10)                                                                                    | 71.253(2)                                                                                              |
| $\beta$ (°)                                       | 90                                                  | 90.0950(10)                                                           | 105.3730(10)                                                                      | 116.589(2)                                                        | 65.5390(10)                                                                                    | 76.9150(10)                                                                                            |
| $\gamma$ (°)                                      | 90                                                  | 90                                                                    | 90                                                                                | 90                                                                | 67.428(2)                                                                                      | 88.743(2)                                                                                              |
| <i>V</i> (Å <sup>3</sup> )                        | 7856.17(16)                                         | 10910.3(2)                                                            | 4868.81(8)                                                                        | 4927.80(11)                                                       | 4516.97(13)                                                                                    | 11457.3(4)                                                                                             |
| Molecular weight                                  | 892.29                                              | 1155.76                                                               | 1250.76                                                                           | 1132.98                                                           | 2005.80                                                                                        | 2744.90                                                                                                |
| Space group                                       | Pna2 <sub>1</sub>                                   | C2/c                                                                  | P2 <sub>1</sub> /c                                                                | P2 <sub>1</sub> /n                                                | P-1                                                                                            | P-1                                                                                                    |
| $\mu$ (mm <sup>-1</sup> )                         | 7.603                                               | 5.573                                                                 | 8.303                                                                             | 6.192                                                             | 6.442                                                                                          | 6.909                                                                                                  |
| Temperature (K)                                   | 100(2)                                              | 100(2)                                                                | 100(2)                                                                            | 100(2)                                                            | 100(2)                                                                                         | 100(2)                                                                                                 |
| <i>Z</i>                                          | 8                                                   | 8                                                                     | 4                                                                                 | 8                                                                 | 2                                                                                              | 4                                                                                                      |
| <i>D</i> <sub>calc</sub> (g/cm <sup>3</sup> )     | 1.509                                               | 1.320                                                                 | 1.706                                                                             | 1.527                                                             | 1.475                                                                                          | 1.591                                                                                                  |
| Crystal size (mm <sup>3</sup> )                   | 0.12 × 0.06 × 0.04                                  | 0.24 × 0.20 × 0.18                                                    | 0.28 × 0.22 × 0.08                                                                | 0.14 × 0.09 × 0.05                                                | 0.1 × 0.06 × 0.04                                                                              | 0.05 × 0.02 × 0.01                                                                                     |
| Diffractometer                                    | XtaLAB Synergy HyPix                                | SuperNova HyPix-3000                                                  | XtaLAB Synergy HyPix                                                              | XtaLAB Synergy HyPix                                              | SuperNova HyPix-3000                                                                           | SuperNova HyPix-3000                                                                                   |
| Radiation                                         | CuK $\alpha$                                        | CuK $\alpha$                                                          | CuK $\alpha$                                                                      | CuK $\alpha$                                                      | CuK $\alpha$                                                                                   | CuK $\alpha$                                                                                           |
| Total reflections                                 | 60294                                               | 34174                                                                 | 57586                                                                             | 42306                                                             | 53279                                                                                          | 115952                                                                                                 |
| Unique reflections                                | 13358                                               | 10387                                                                 | 10258                                                                             | 10407                                                             | 16700                                                                                          | 42116                                                                                                  |
| Angle range 2 $\theta$ (°)                        | 5.882 to 160.37                                     | 5.184 to 141.788                                                      | 4.156 to 160.688                                                                  | 5.904 to 160.44                                                   | 5.482 to 138.33                                                                                | 3.342 to 139.448                                                                                       |
| Reflections with $ F_o  \geq 4\sigma_F$           | 12199                                               | 9440                                                                  | 9556                                                                              | 9323                                                              | 14807                                                                                          | 32782                                                                                                  |
| <i>R</i> <sub>int</sub>                           | 0.0402                                              | 0.0266                                                                | 0.0476                                                                            | 0.0450                                                            | 0.0354                                                                                         | 0.0597                                                                                                 |
| <i>R</i> <sub><math>\sigma</math></sub>           | 0.0304                                              | 0.0239                                                                | 0.0309                                                                            | 0.0379                                                            | 0.0321                                                                                         | 0.0547                                                                                                 |
| <i>R</i> <sub>1</sub> ( $ F_o  \geq 4\sigma_F$ )  | 0.0428                                              | 0.0392                                                                | 0.0311                                                                            | 0.0359                                                            | 0.0542                                                                                         | 0.0709                                                                                                 |
| <i>wR</i> <sub>2</sub> ( $ F_o  \geq 4\sigma_F$ ) | 0.1119                                              | 0.1058                                                                | 0.0756                                                                            | 0.0875                                                            | 0.1461                                                                                         | 0.1778                                                                                                 |
| <i>R</i> <sub>1</sub> (all data)                  | 0.0475                                              | 0.0422                                                                | 0.0335                                                                            | 0.0398                                                            | 0.0591                                                                                         | 0.0929                                                                                                 |

|                                                                                                                                                                                                                                                                                                                                             |             |             |             |             |             |             |
|---------------------------------------------------------------------------------------------------------------------------------------------------------------------------------------------------------------------------------------------------------------------------------------------------------------------------------------------|-------------|-------------|-------------|-------------|-------------|-------------|
| $wR_2$ (all data)                                                                                                                                                                                                                                                                                                                           | 0.1156      | 0.1086      | 0.0769      | 0.0898      | 0.1520      | 0.1962      |
| $S$                                                                                                                                                                                                                                                                                                                                         | 1.057       | 1.042       | 1.082       | 1.088       | 1.044       | 1.057       |
| $\rho_{\min}, \rho_{\max}, e/\text{\AA}^3$                                                                                                                                                                                                                                                                                                  | -1.67, 2.03 | -0.93, 2.83 | -0.94, 0.81 | -1.10, 1.27 | -1.53, 6.21 | -1.79, 3.37 |
| CCDC                                                                                                                                                                                                                                                                                                                                        | 2242753     | 2242764     | 2242765     | 2242766     | 2242769     | 2242797     |
| $R_1 = \Sigma   F_o  -  F_c   / \Sigma  F_o $ ; $wR_2 = \{\Sigma[w(F_o^2 - F_c^2)^2] / \Sigma[w(F_o^2)^2]\}^{1/2}$ ; $w = 1 / [\sigma^2(F_o^2) + (aP)^2 + bP]$ , where $P = (F_o^2 + 2F_c^2)/3$ ; $s = \{\Sigma[w(F_o^2 - F_c^2)] / (n - p)\}^{1/2}$ where $n$ is the number of reflections and $p$ is the number of refinement parameters. |             |             |             |             |             |             |

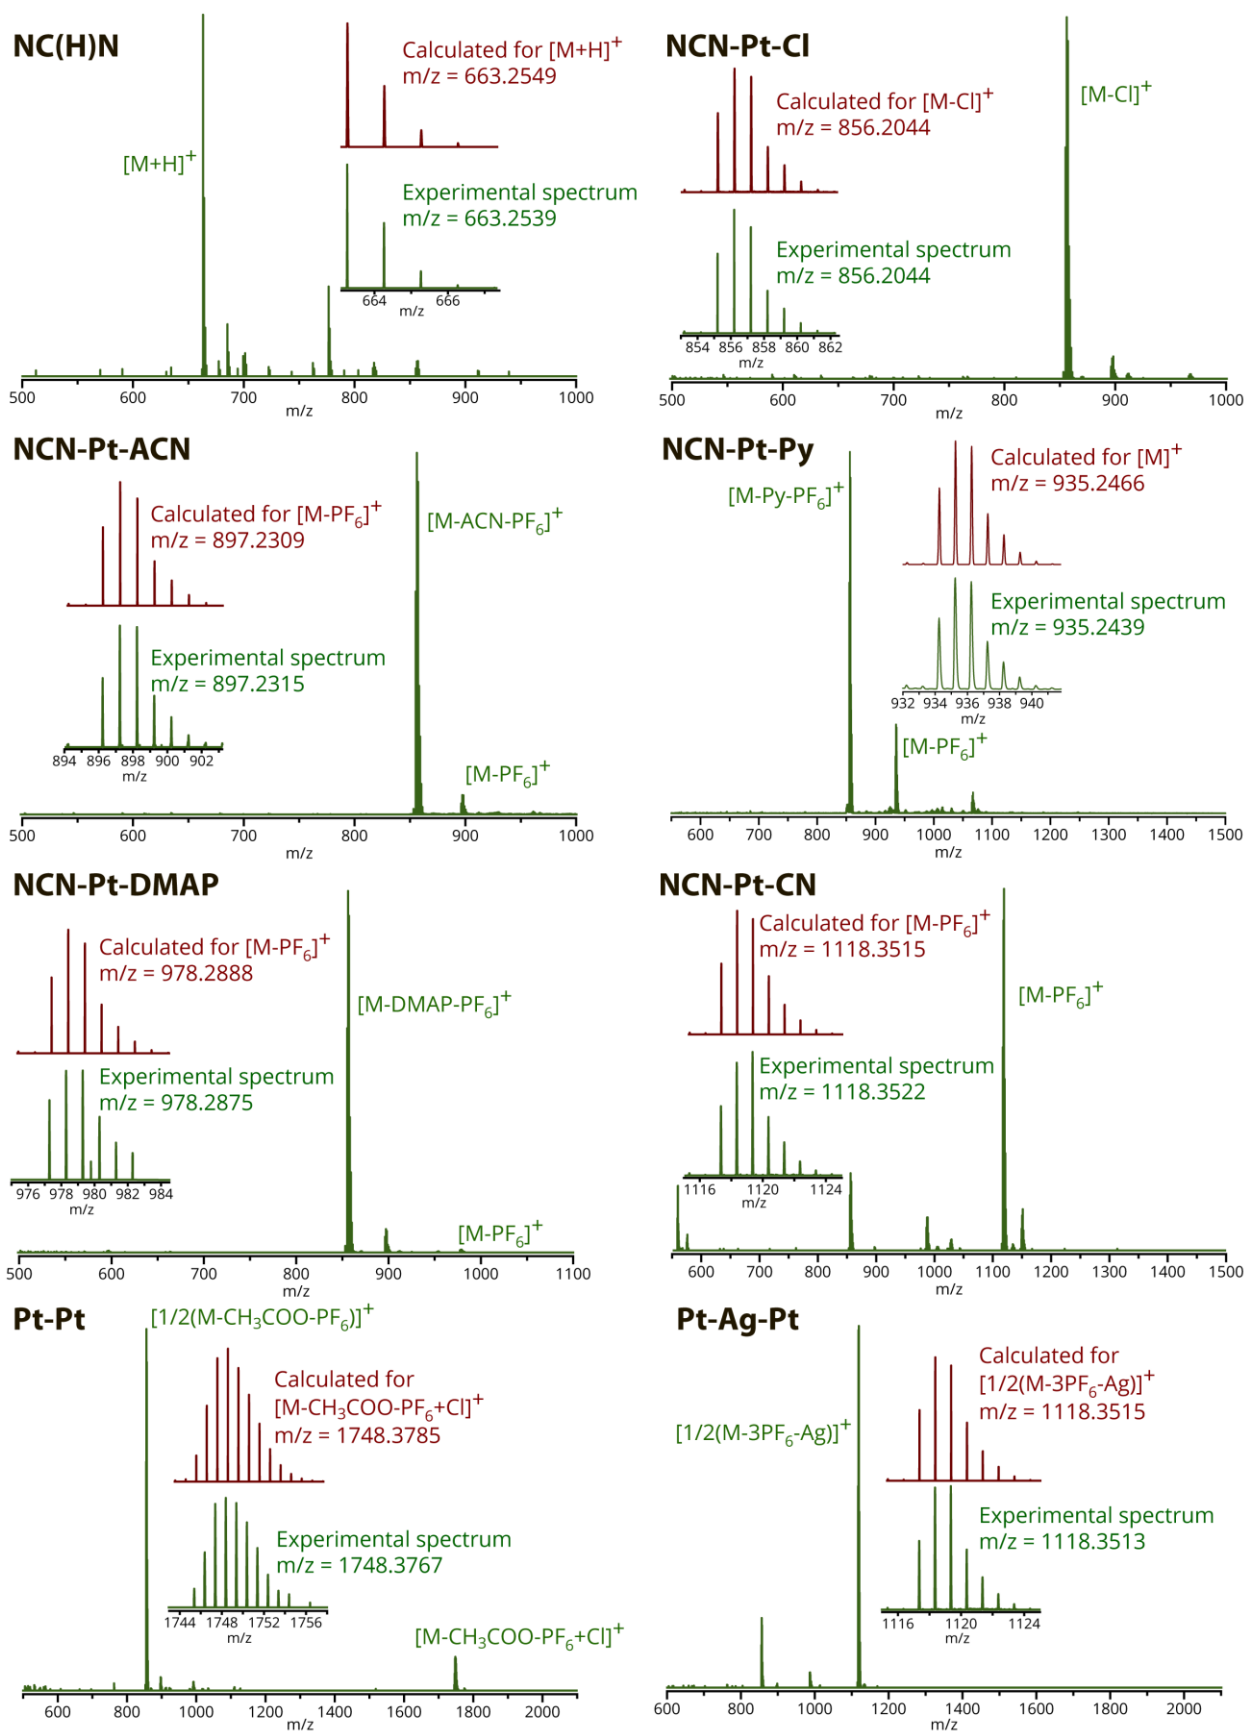

Figure S2. ESI<sup>+</sup> mass-spectra of NC(H)N ligand and platinum complexes.

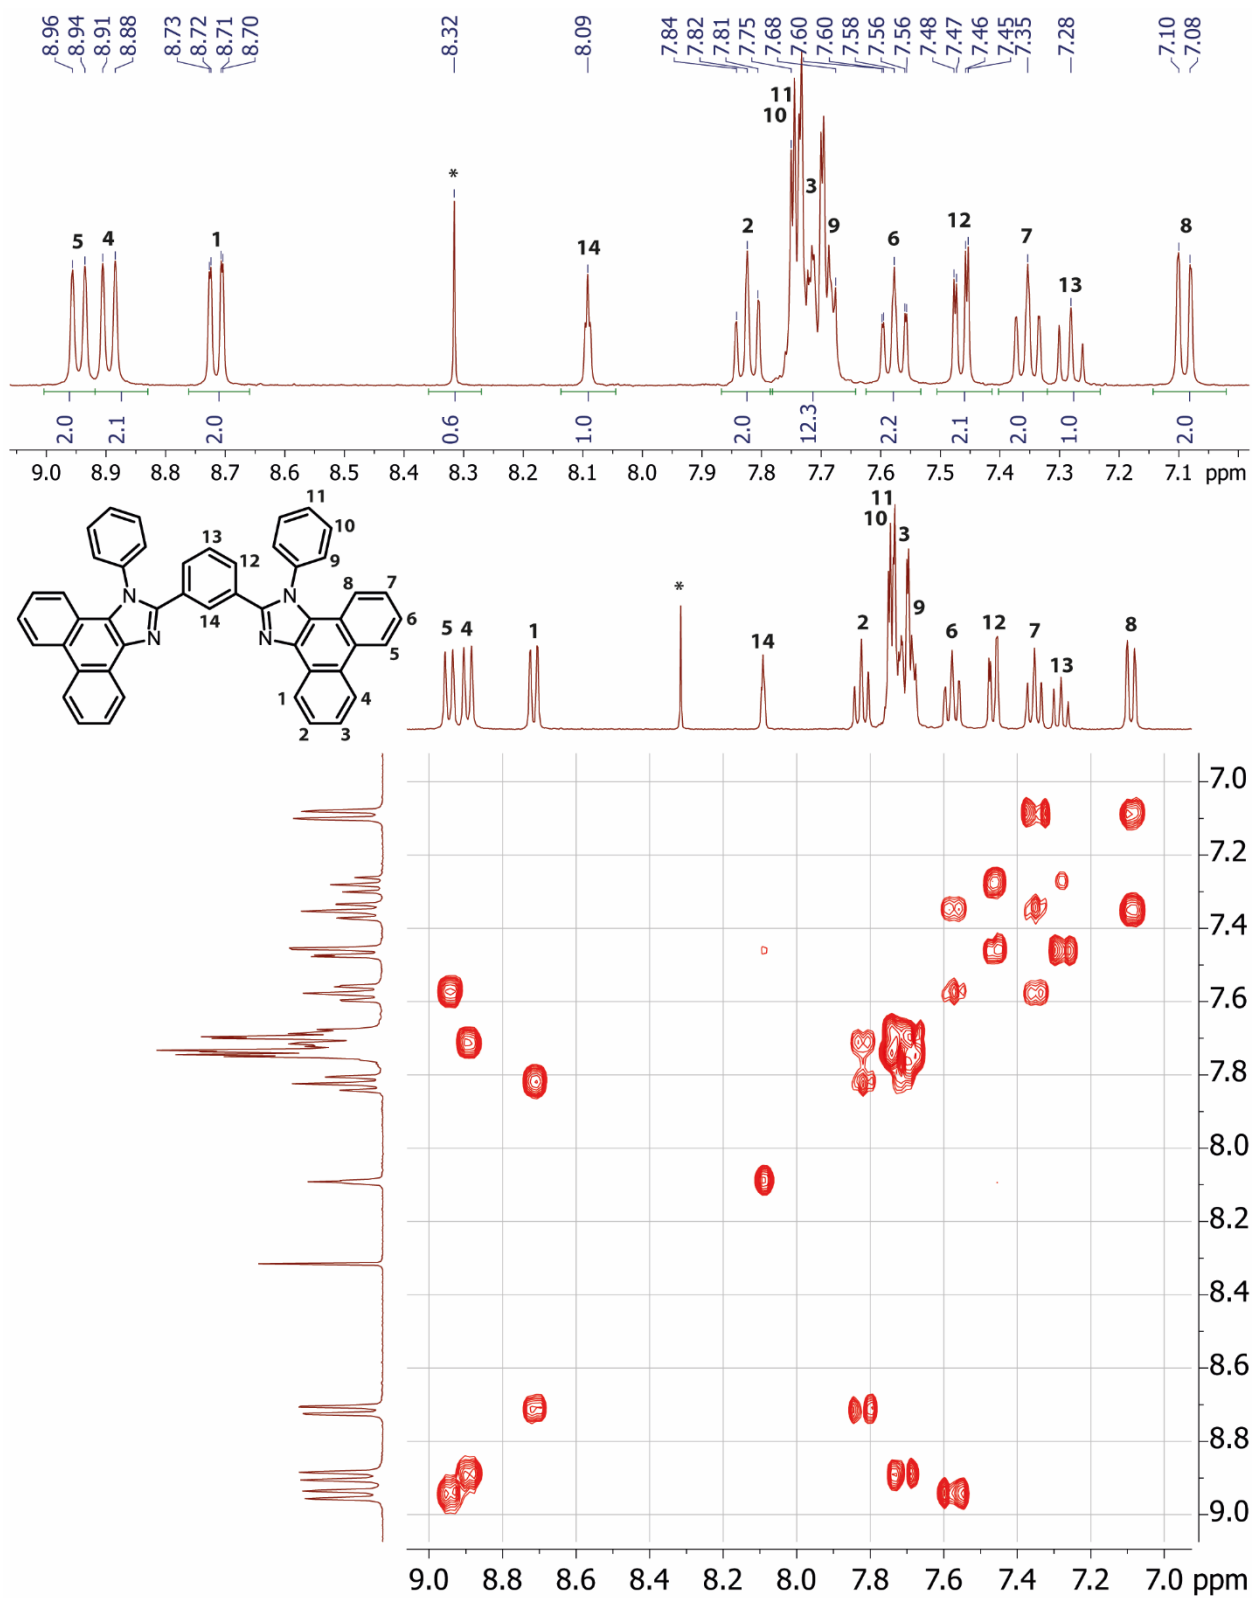

Figure S3.  $^1\text{H}$  and COSY NMR spectra of  $\text{NC(H)N}$  in  $\text{DMSO-d}_6$ , 298 K.

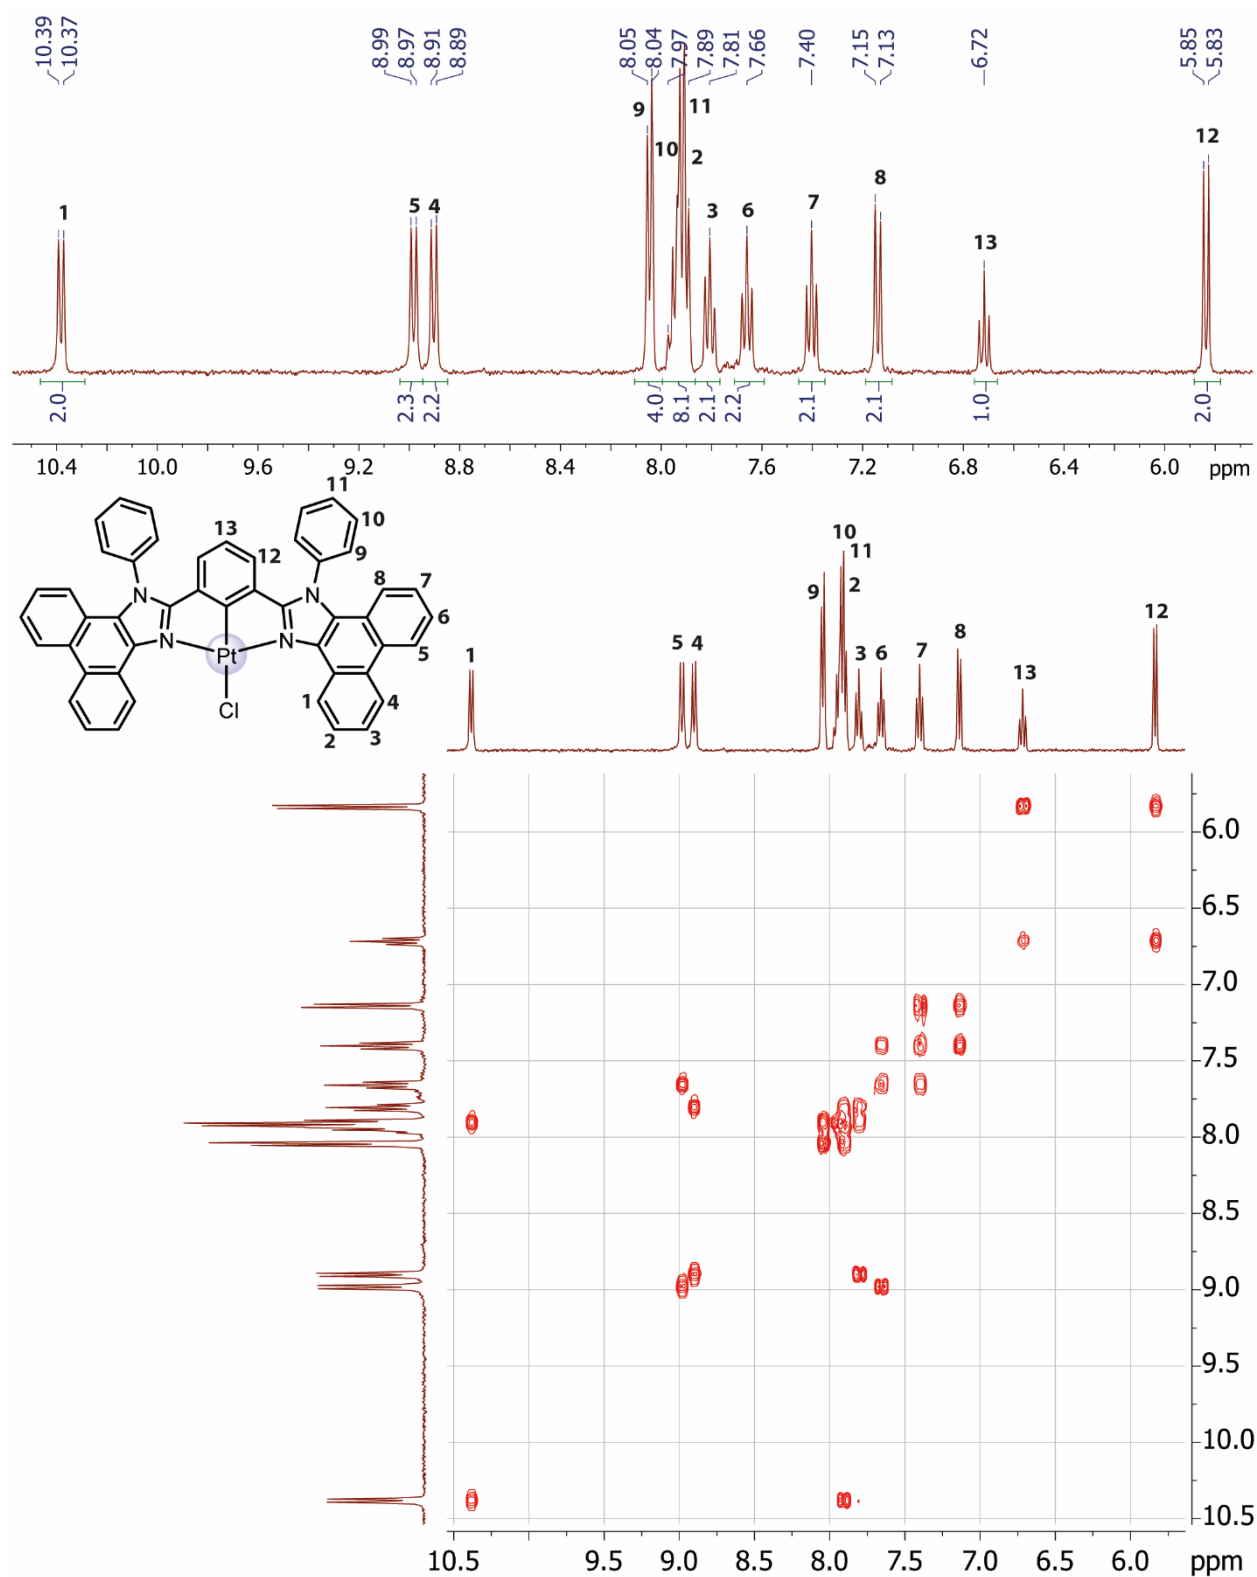

Figure S4.  $^1\text{H}$  and COSY NMR spectra of  $\text{NCN-Pt-Cl}$  in  $\text{DMSO-d}_6$ , 298 K.

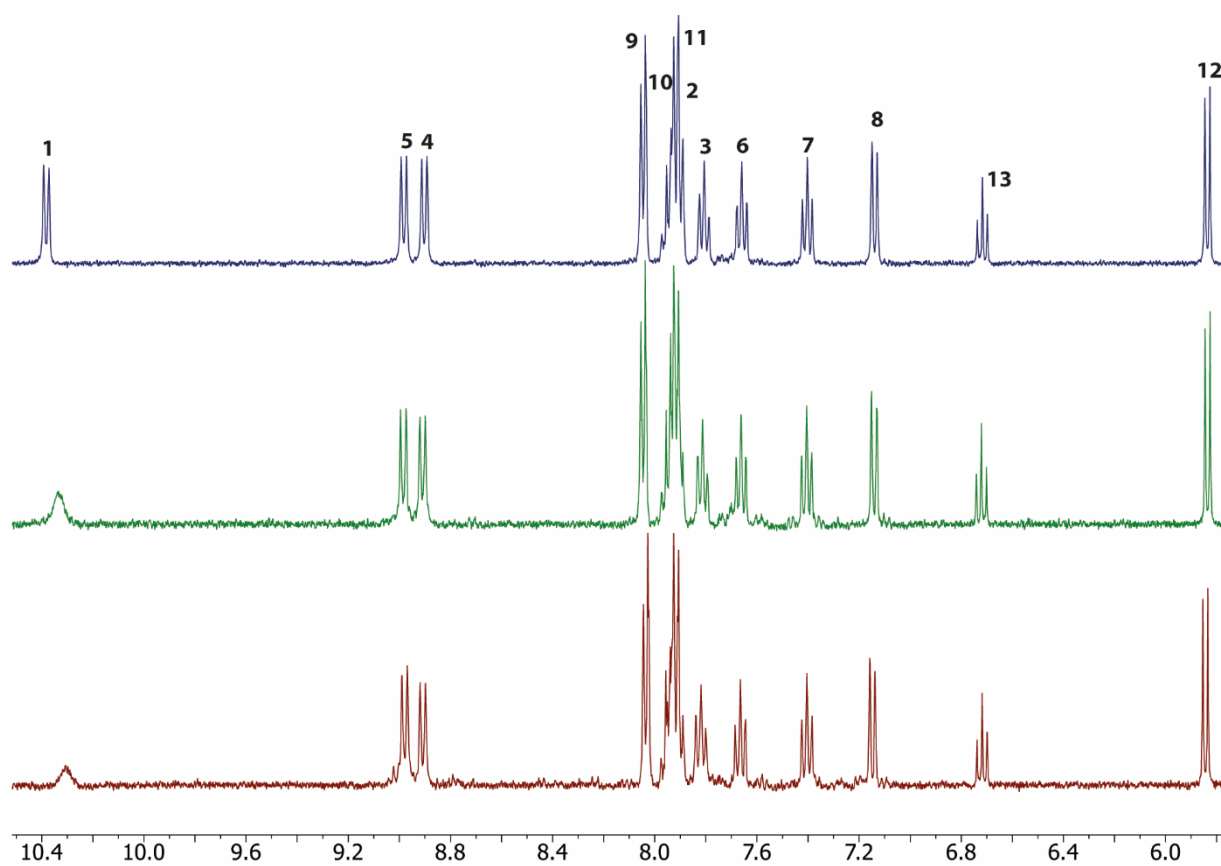

Figure S5.  $^1\text{H}$  NMR spectra of NCN-Pt-Cl in DMSO- $d_6$  at different concentrations, 298 K.

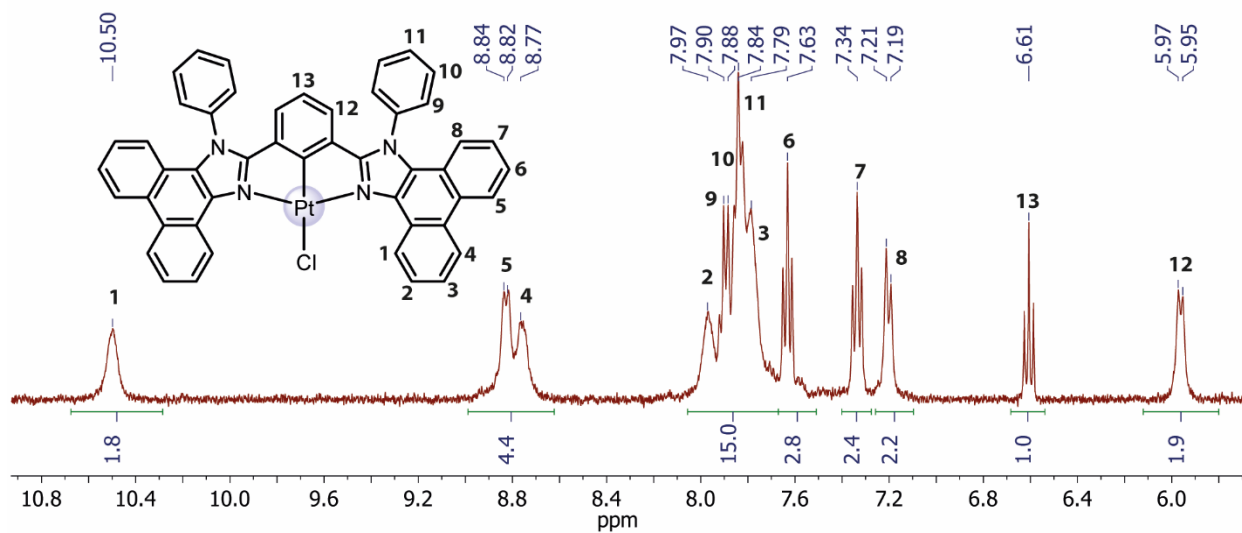

Figure S6.  $^1\text{H}$  NMR spectrum of NCN-Pt-Cl in  $\text{CD}_2\text{Cl}_2$ , 298 K.



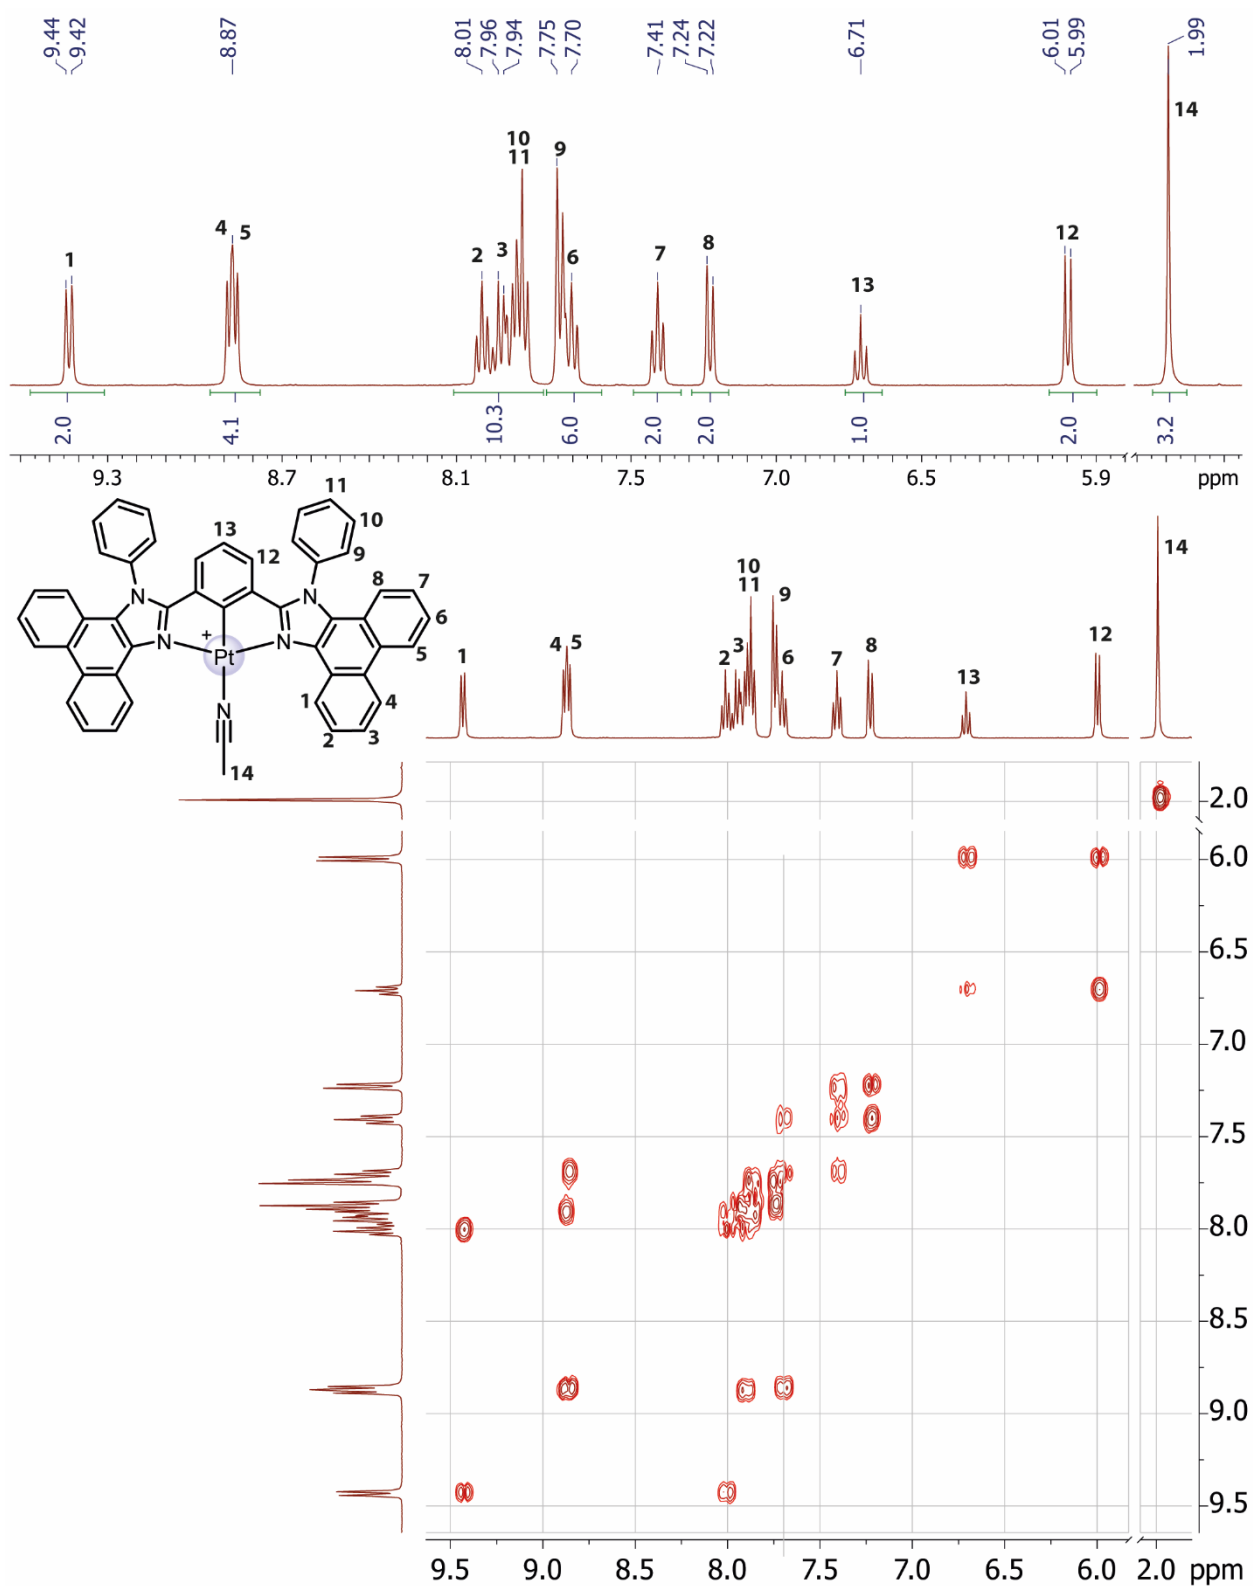

Figure S7.  $^1\text{H}$  and COSY NMR spectra of  $\text{NCN-Pt-ACN}$  in  $\text{CD}_2\text{Cl}_2$ , 298 K.

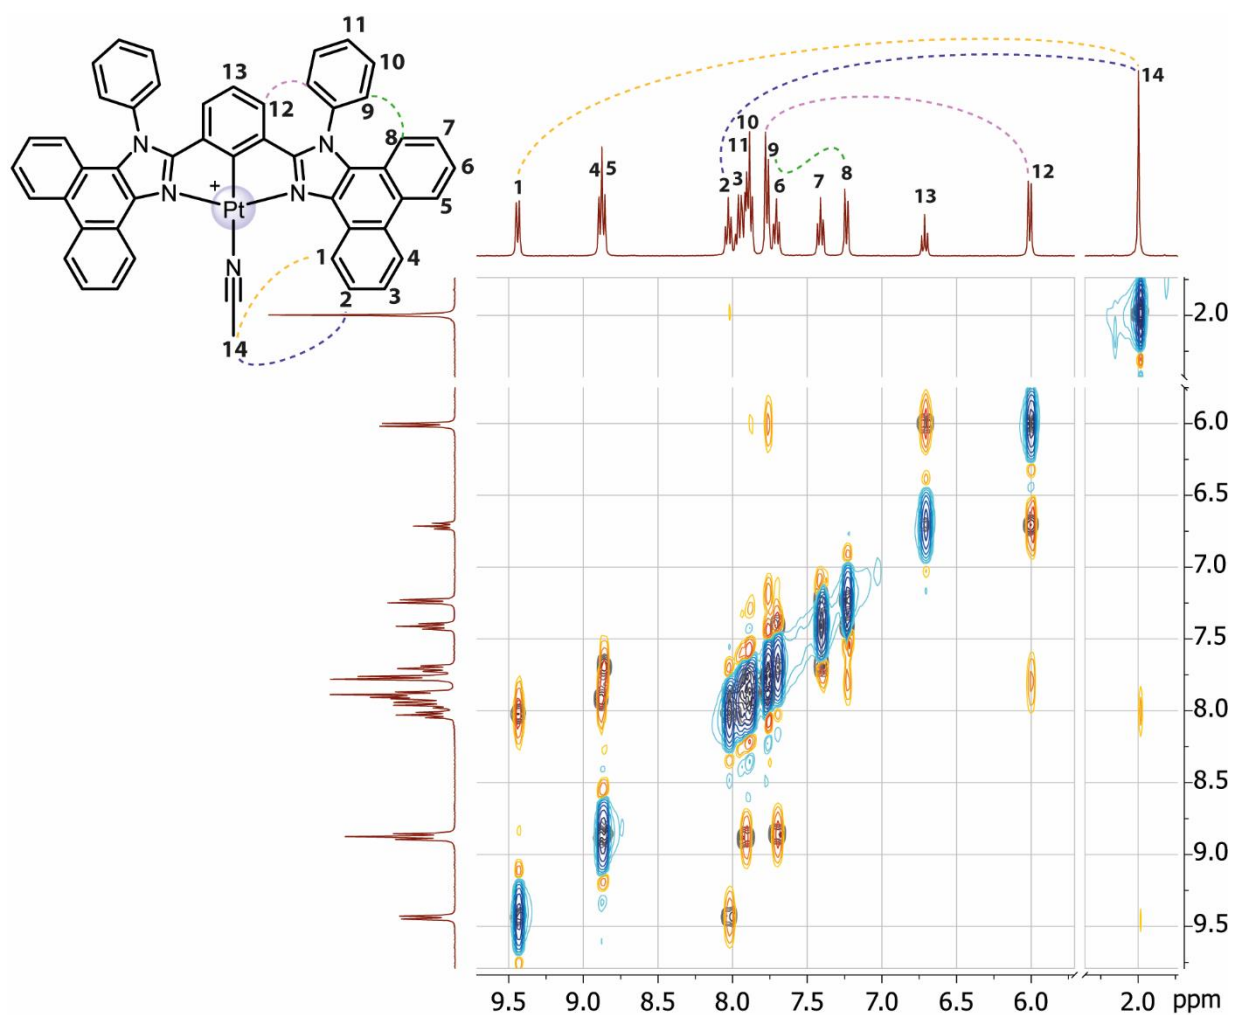

**Figure S8.** Overlapped  $^1\text{H}$ - $^1\text{H}$  COSY and NOESY NMR spectra of NCN-Pt-ACN with full assignment of the signals. Top-left structure of the complex shows atom numbering scheme, short contacts between protons revealed in the NOESY spectrum are also accompanied with the distances found in solid state structure.

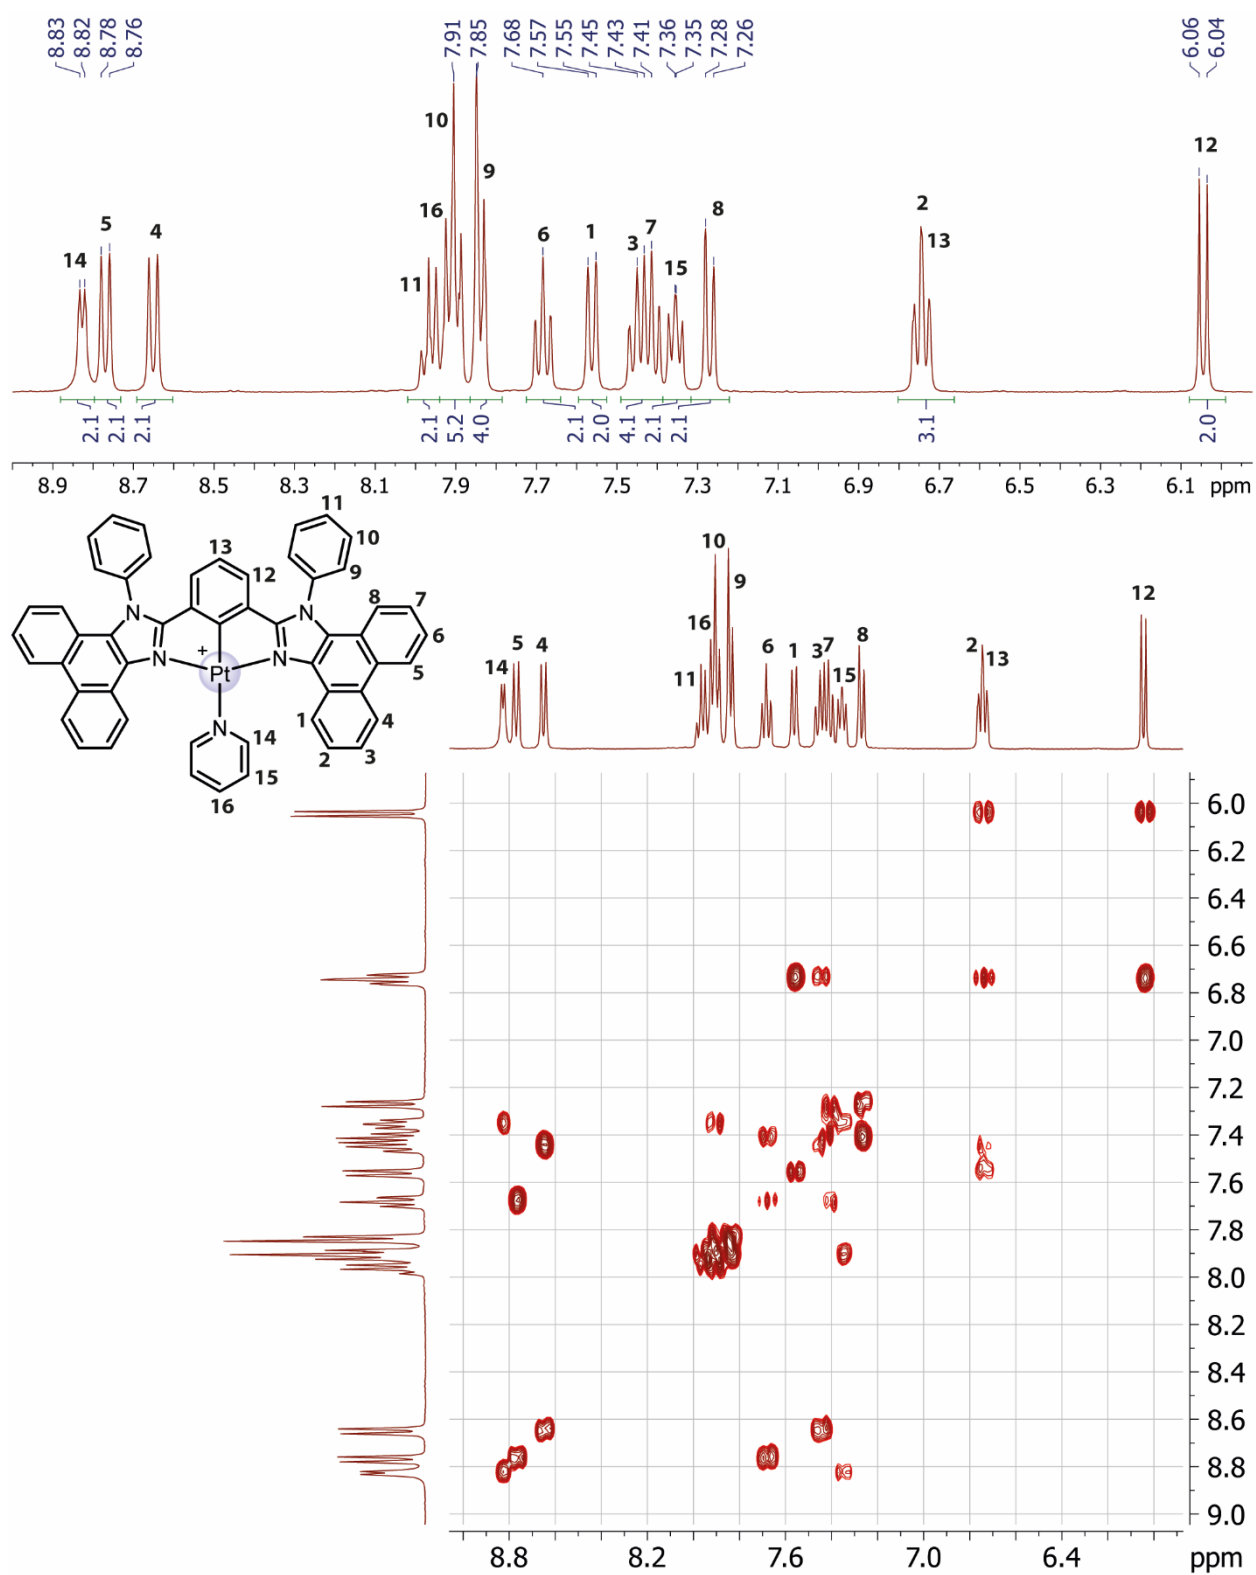

Figure S9.  $^1\text{H}$  and COSY NMR spectra of NCN-Pt-Py in  $\text{CD}_2\text{Cl}_2$ , 298 K.

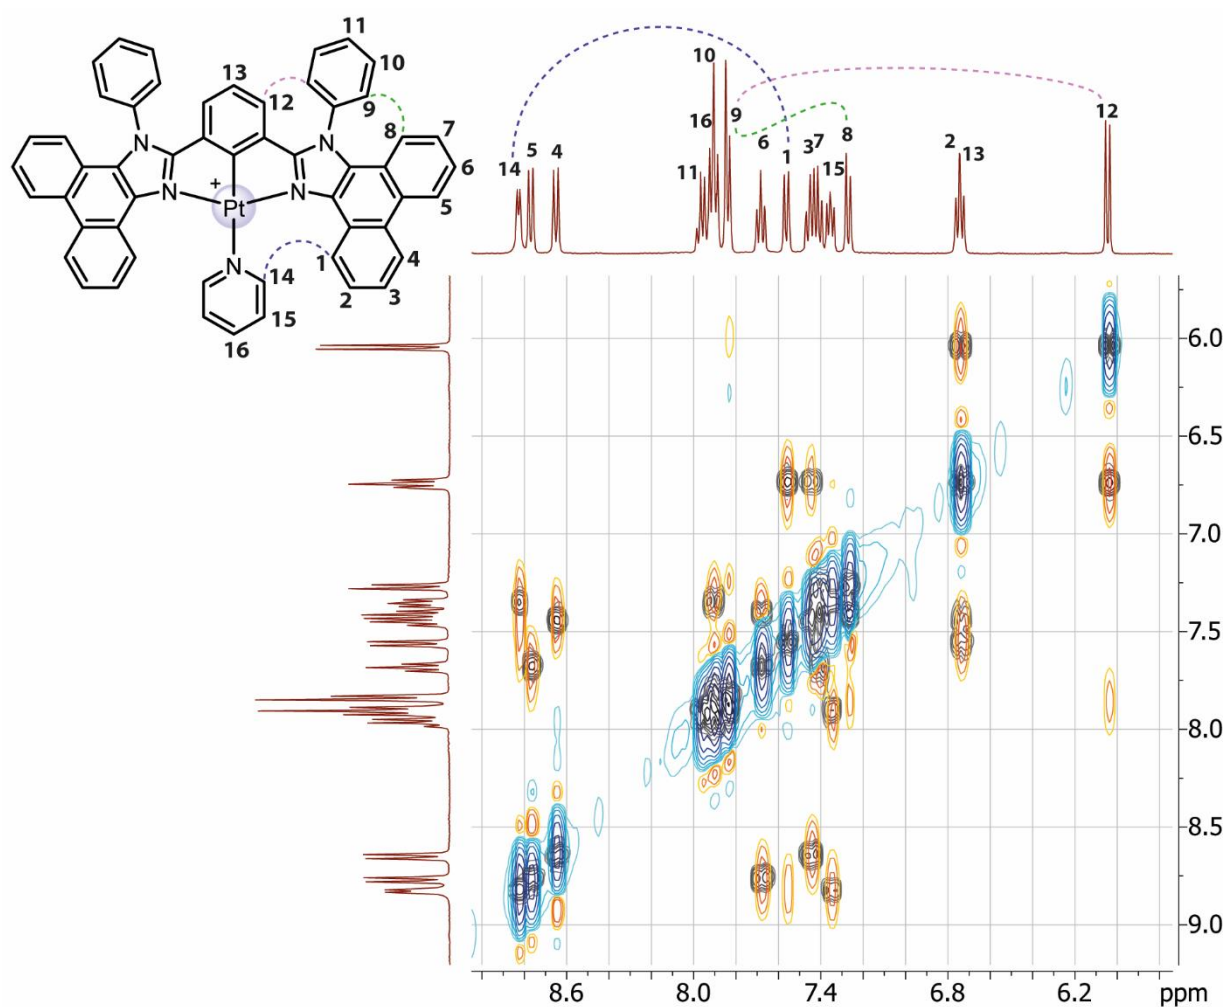

**Figure S10.** Overlapped  $^1\text{H}$ - $^1\text{H}$  COSY (gray) and NOESY (orange and blue) NMR spectra of NCN-Pt-Py with full assignment of the signals. Top-left structure of the complex shows atom numbering scheme.

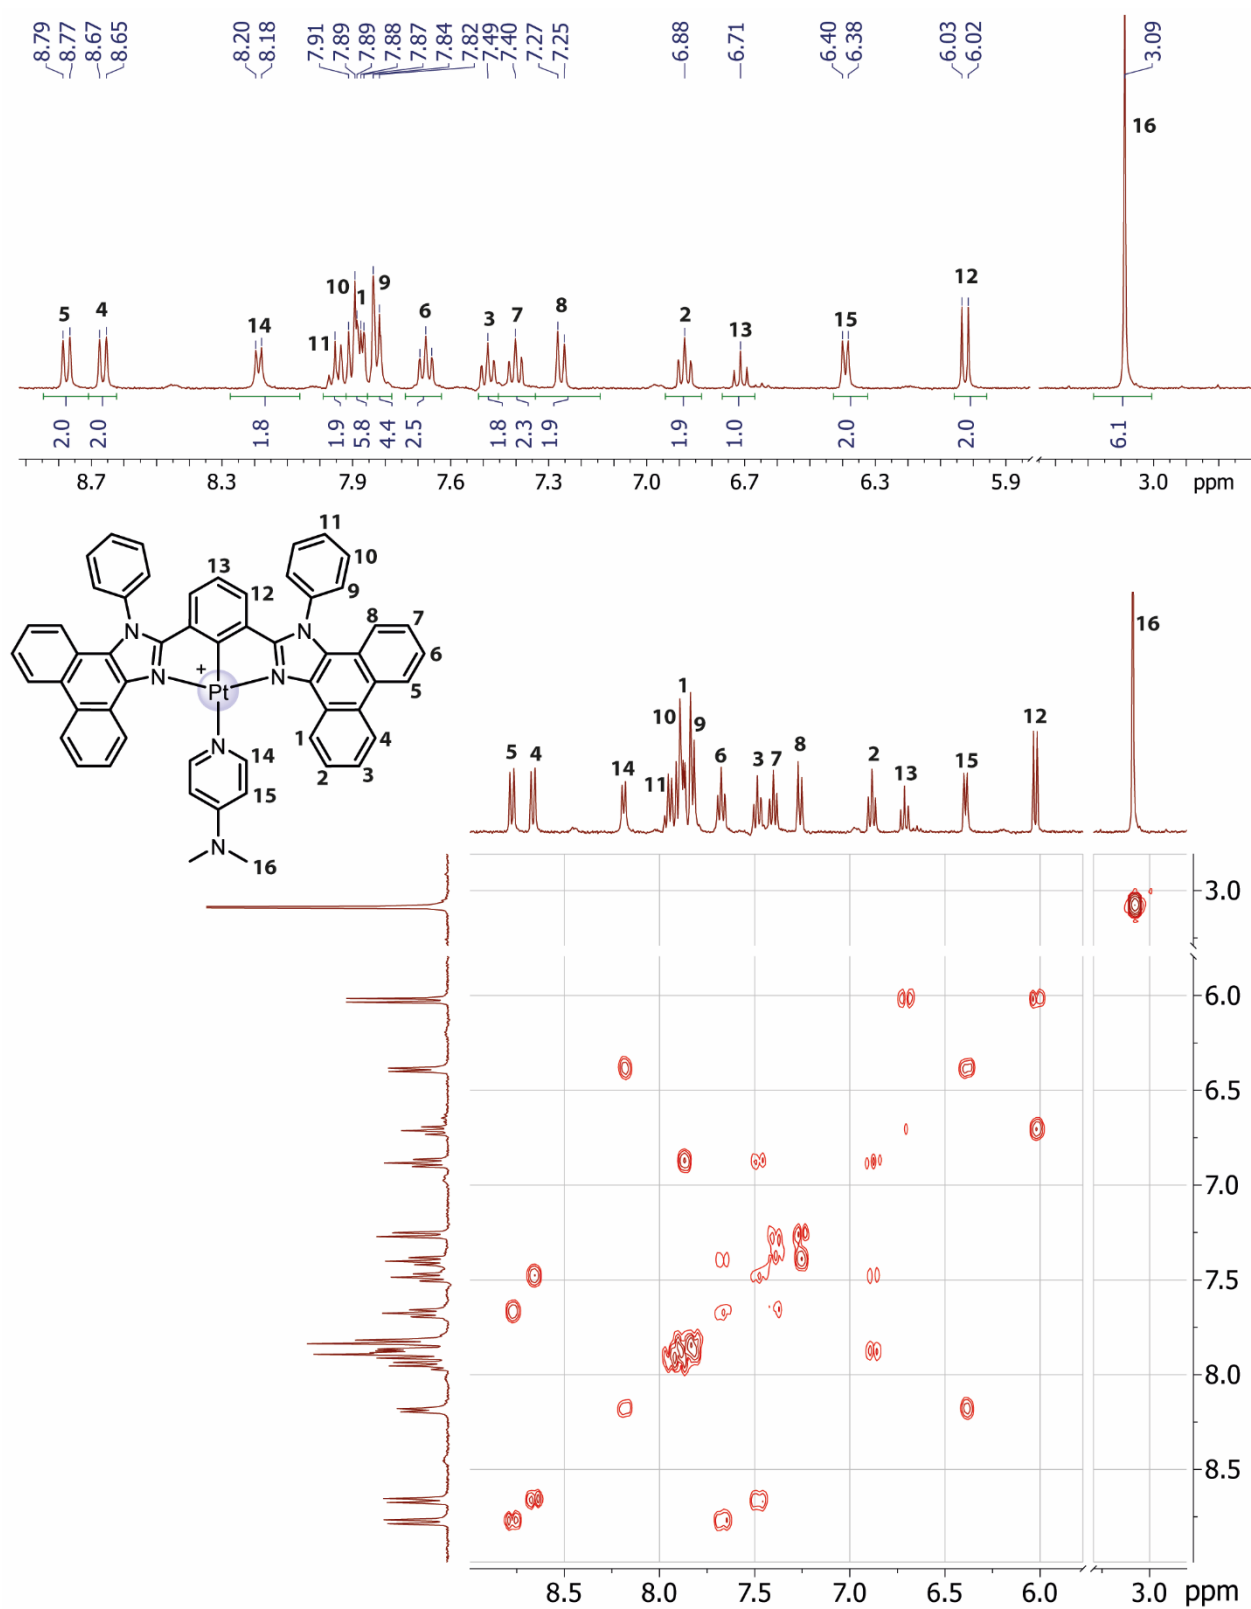

Figure S11.  $^1\text{H}$  and COSY NMR spectra of NCN-Pt-DMAP in  $\text{CD}_2\text{Cl}_2$ , 298 K.

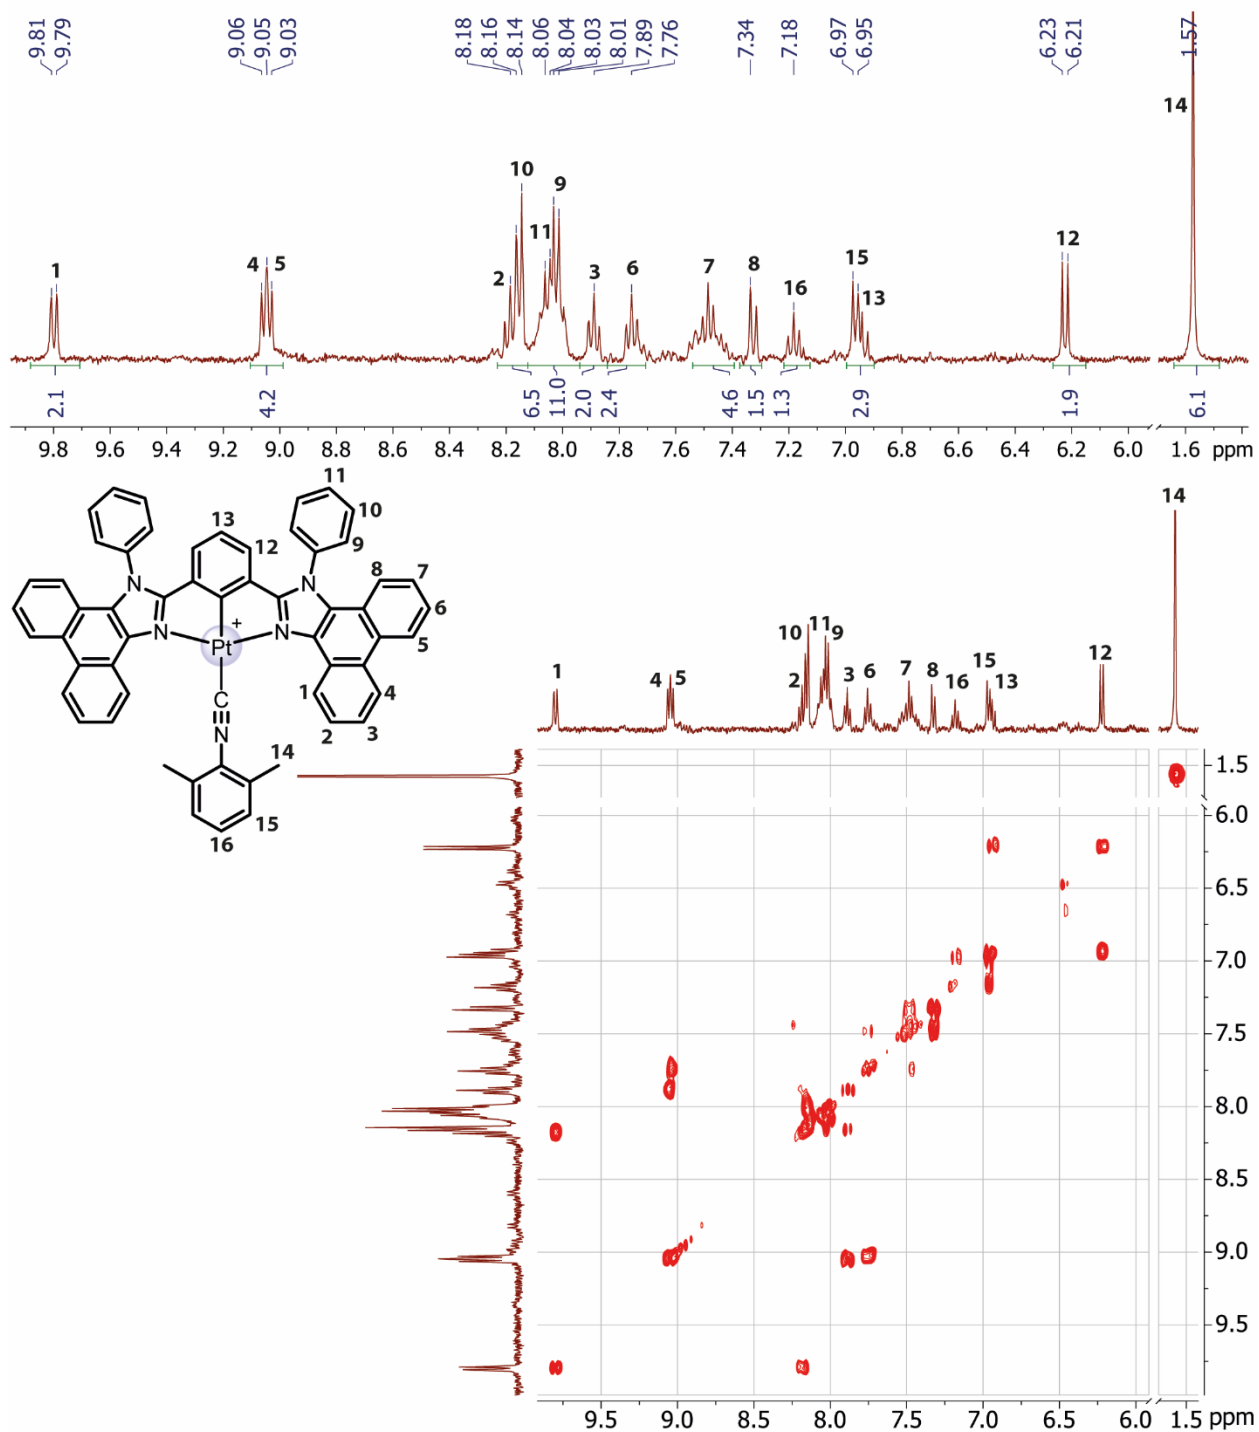

Figure S12.  $^1\text{H}$  and COSY NMR spectra of  $\text{NCN-Pt-CN}$  in  $\text{acetone-d}_6$ , 298 K.

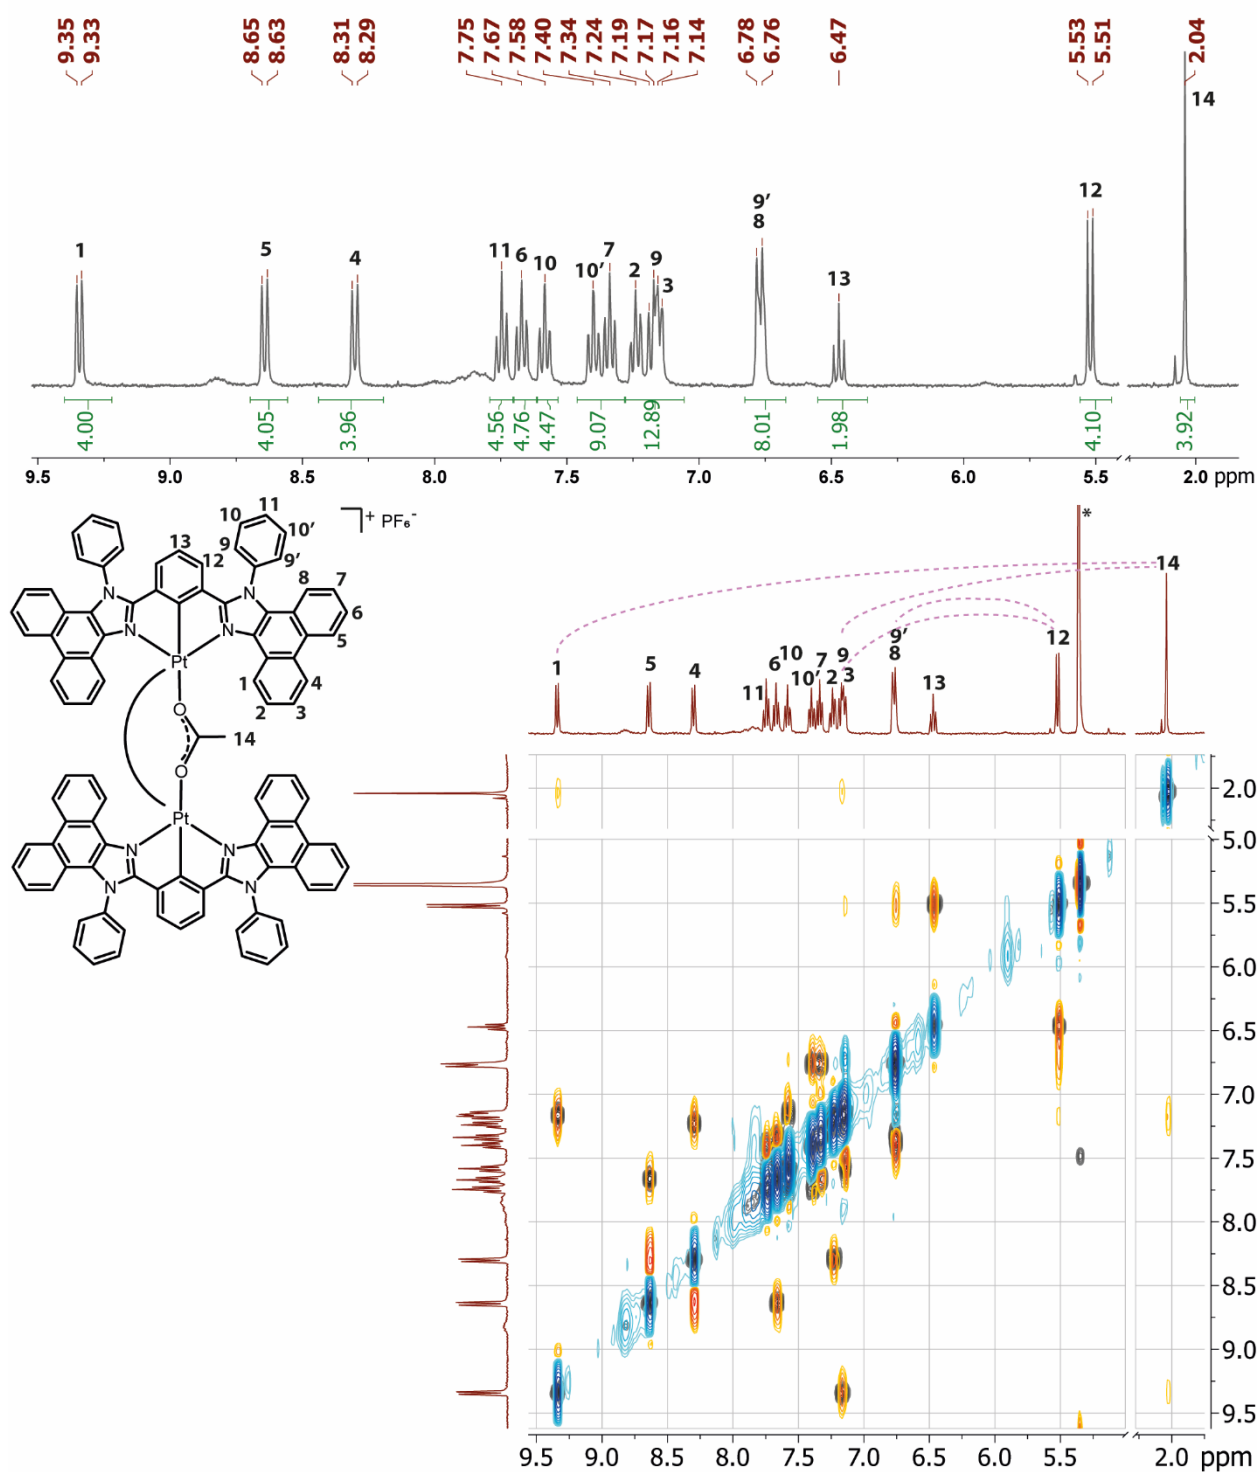

Figure S13.  $^1\text{H}$  and overlapped  $^1\text{H}$ - $^1\text{H}$  COSY (gray) and NOESY (orange and blue) NMR spectra of Pt-Pt with full assignment of the signals,  $\text{CD}_2\text{Cl}_2$ , 298 K. Top-left structure of the complex shows atom numbering scheme.

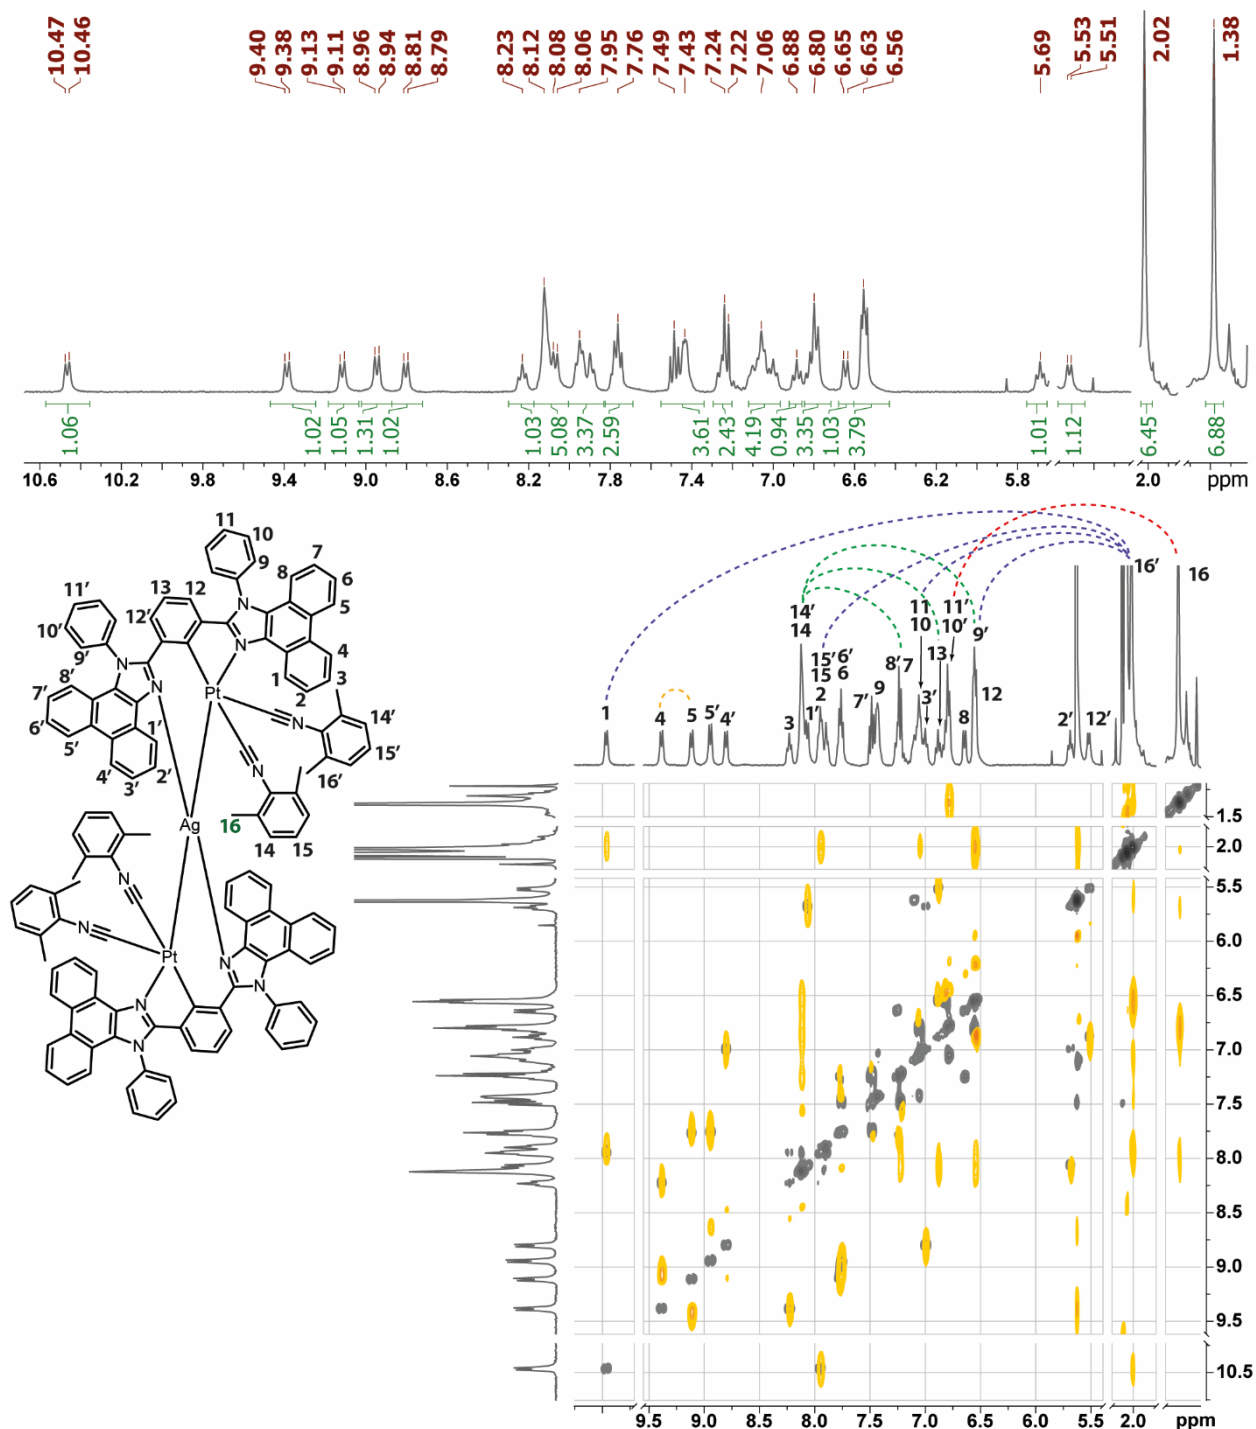

Figure S14.  $^1\text{H}$  and overlapped  $^1\text{H}$ - $^1\text{H}$  COSY (gray) and NOESY (orange and blue) NMR spectra of Pt-Ag-Pt with full assignment of the signals,  $\text{acetone-d}_6$ , 298 K. Top-left structure of the complex shows atom numbering scheme.



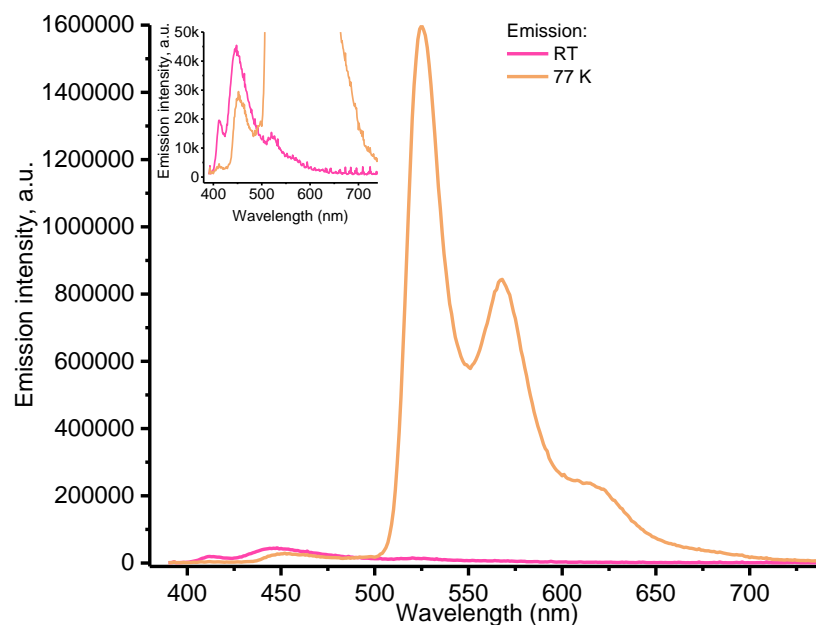

Figure S15. Emission spectra NCN-Pt-Cl in DCM at RT and 77 K,  $c = 1 \times 10^{-4}$  M.

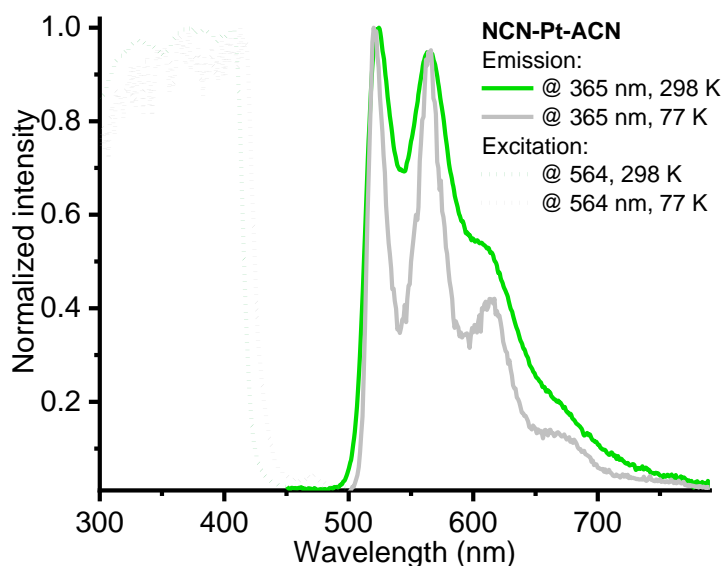

Figure S16. Excitation (dashed line) and emission (solid line) spectra NCN-Pt-ACN in DCM at RT and 77 K, concentration =  $1 \times 10^{-4}$  M.

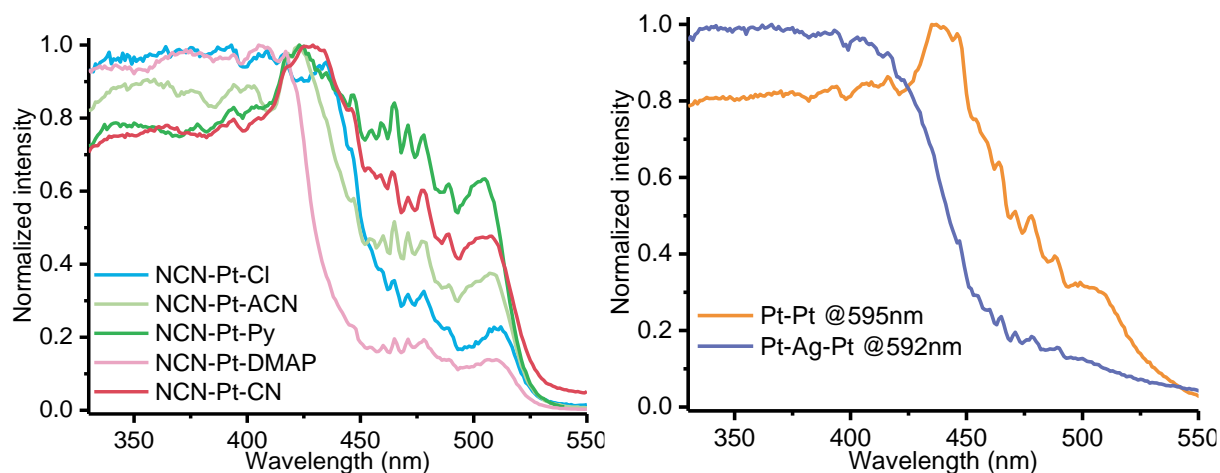

Figure S17. Excitation spectra of complexes in the solid state,  $\lambda_{em} = 566$  nm for mononuclear complexes, 298 K.

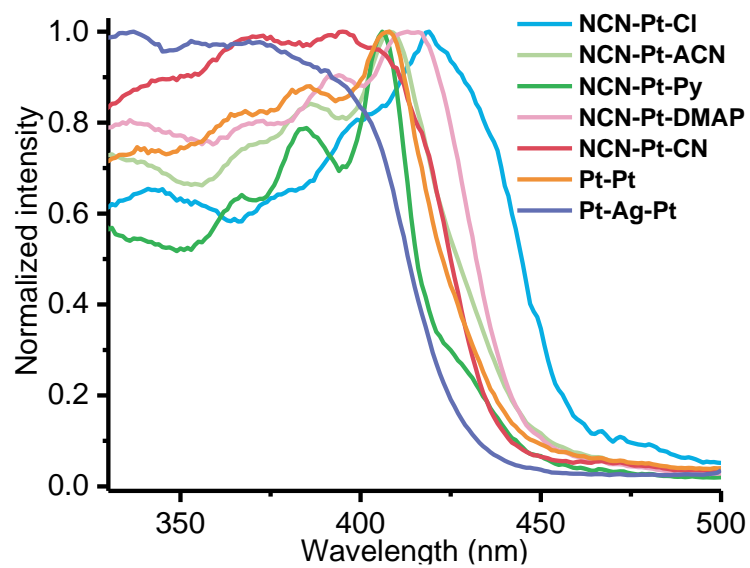

Figure S18. Excitation spectra of complexes in PMMA film,  $\lambda_{em}$  – emission maximum, 298 K.

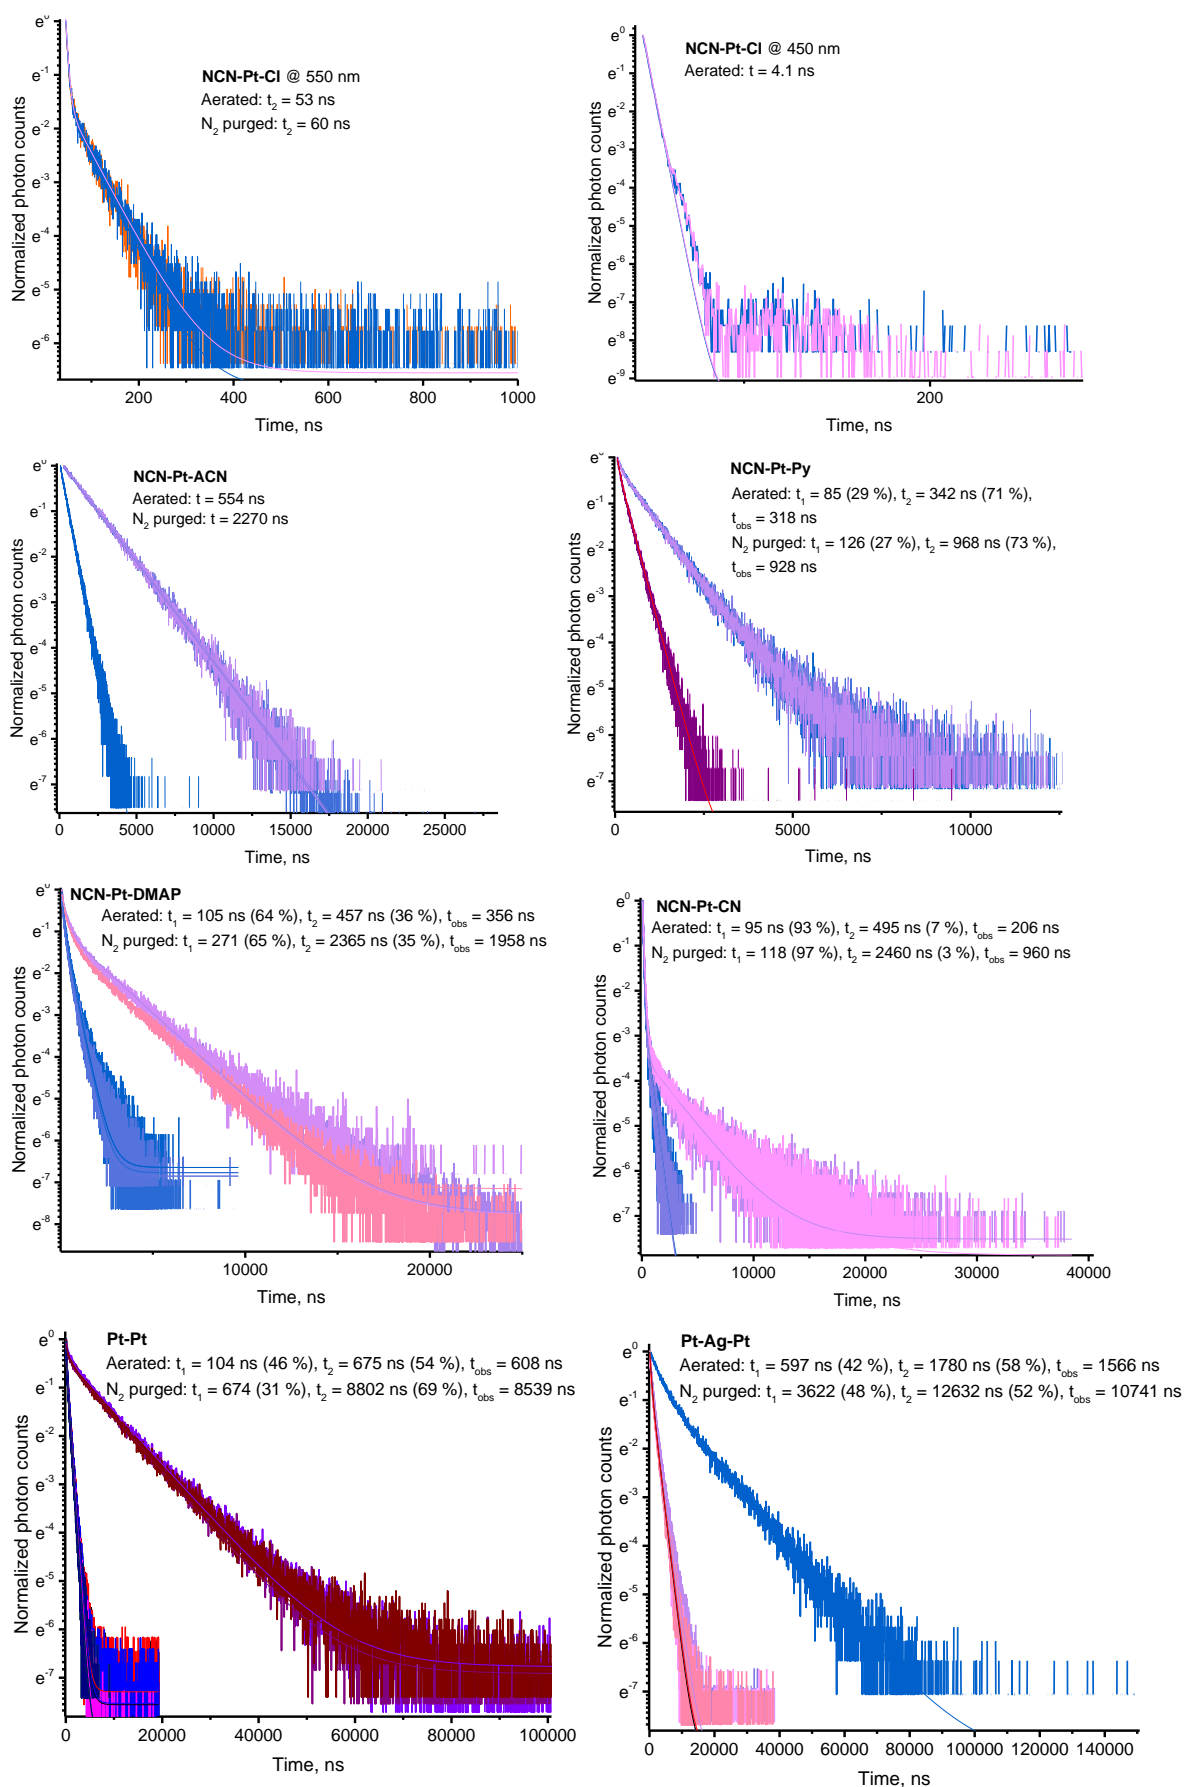

**Figure S19.** Lifetime decays of complexes in aerated and argon purged DCM solutions,  $\lambda_{\text{ex}} = 355$  nm.

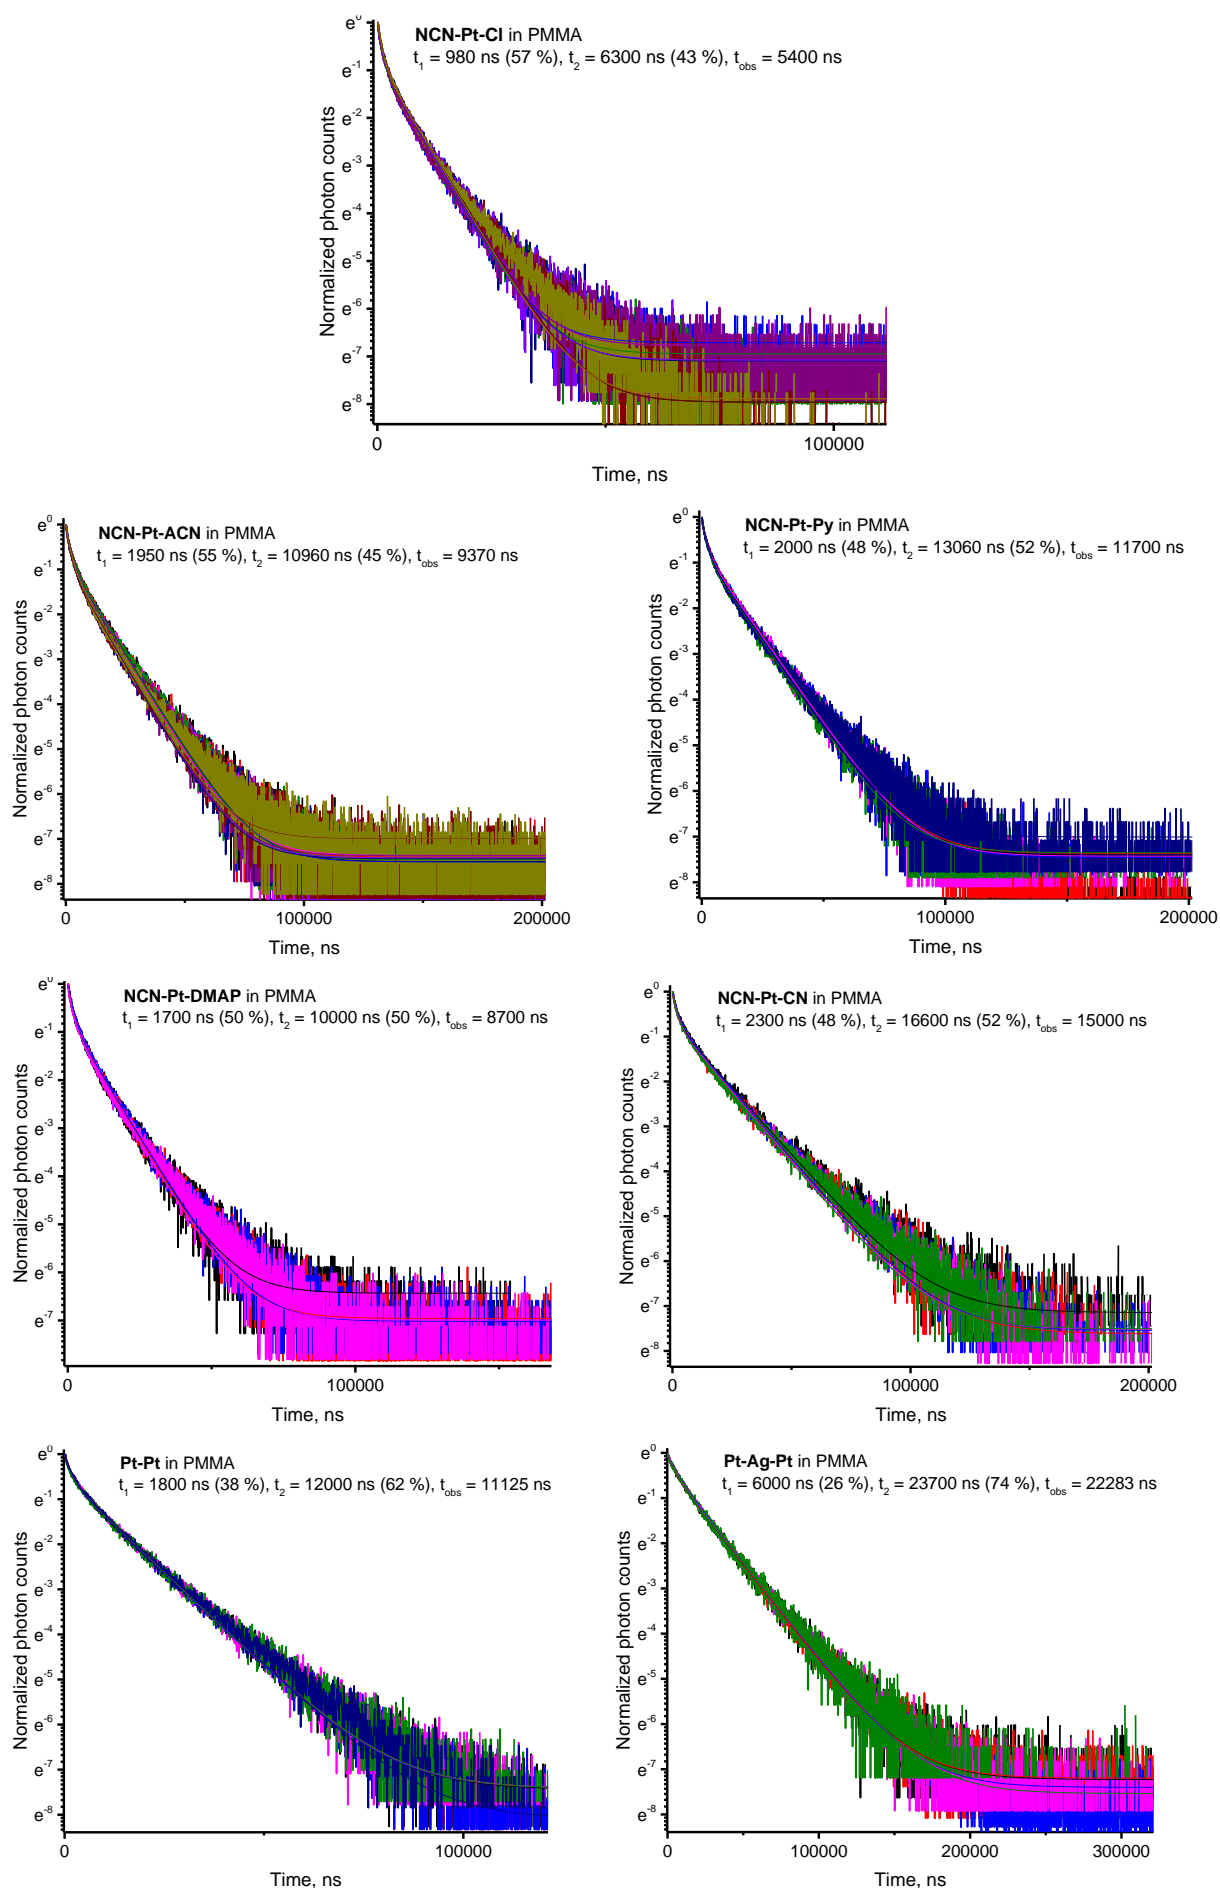

Figure S20. Lifetime decays of complexes in PMMA,  $\lambda_{\text{ex}} = 355 \text{ nm}$ .

**Table S3. Calculated absorption maxima ( $\lambda$ ) and oscillator strengths ( $f$ ) of NCN-Pt-Cl.**

| Transitions           | $\lambda$ , nm<br>(calc) | $f$<br>(calc) | Contribution of main NTO<br>pair in transition (%) |
|-----------------------|--------------------------|---------------|----------------------------------------------------|
| $S_0 \rightarrow S_4$ | 251                      | 0.19          | 32                                                 |
| $S_0 \rightarrow S_3$ | 298                      | 0.20          | 46                                                 |
| $S_0 \rightarrow S_2$ | 349                      | 0.13          | 52                                                 |
| $S_0 \rightarrow S_1$ | 393                      | 0.58          | 97                                                 |

**Table S4. The decrease (violet) and increase (terracotta) of electron density for most intensive electronic absorption transitions of NCN-Pt-Cl. The data for the corresponding interfragment charge transfer (IFCT) are given below the figures. Diagonal values represent intraligand transitions, off-diagonal values represent a charge transfer from “Donor” to “Acceptor”.**

|                                                                                     |          |       |       |                                                                                      |          |       |       |
|-------------------------------------------------------------------------------------|----------|-------|-------|--------------------------------------------------------------------------------------|----------|-------|-------|
| 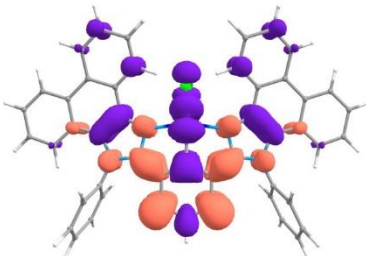   |          |       |       |    |          |       |       |
| S <sub>0</sub> -S <sub>1</sub>                                                      |          |       |       | S <sub>0</sub> -S <sub>2</sub>                                                       |          |       |       |
|                                                                                     | Acceptor |       |       |                                                                                      | Acceptor |       |       |
| Donor                                                                               | Pt       | Cl    | NCN   | Donor                                                                                | Pt       | Cl    | NCN   |
| Pt                                                                                  | 0.001    | 0.000 | 0.167 | Pt                                                                                   | 0.016    | 0.001 | 0.143 |
| Cl                                                                                  | 0.001    | 0.000 | 0.075 | Cl                                                                                   | 0.006    | 0.000 | 0.055 |
| NCN                                                                                 | 0.006    | 0.000 | 0.751 | NCN                                                                                  | 0.080    | 0.002 | 0.696 |
|  |          |       |       |  |          |       |       |
| S <sub>0</sub> -S <sub>3</sub>                                                      |          |       |       | S <sub>0</sub> -S <sub>4</sub>                                                       |          |       |       |
|                                                                                     | Acceptor |       |       |                                                                                      | Acceptor |       |       |
| Donor                                                                               | Pt       | Cl    | NCN   | Donor                                                                                | Pt       | Cl    | NCN   |
| Pt                                                                                  | 0.001    | 0.000 | 0.073 | Pt                                                                                   | 0.051    | 0.000 | 0.053 |
| Cl                                                                                  | 0.000    | 0.000 | 0.025 | Cl                                                                                   | 0.038    | 0.000 | 0.040 |
| NCN                                                                                 | 0.015    | 0.000 | 0.886 | NCN                                                                                  | 0.398    | 0.001 | 0.418 |
|  |          |       |       |                                                                                      |          |       |       |
| T <sub>1</sub> -S <sub>0</sub>                                                      |          |       |       |                                                                                      |          |       |       |
|                                                                                     | Acceptor |       |       |                                                                                      |          |       |       |
| Donor                                                                               | Pt       | Cl    | NCN   |                                                                                      |          |       |       |
| Pt                                                                                  | 0.003    | 0.000 | 0.034 |                                                                                      |          |       |       |
| Cl                                                                                  | 0.000    | 0.000 | 0.001 |                                                                                      |          |       |       |

|     |       |       |       |
|-----|-------|-------|-------|
| NCN | 0.077 | 0.009 | 0.876 |
|-----|-------|-------|-------|

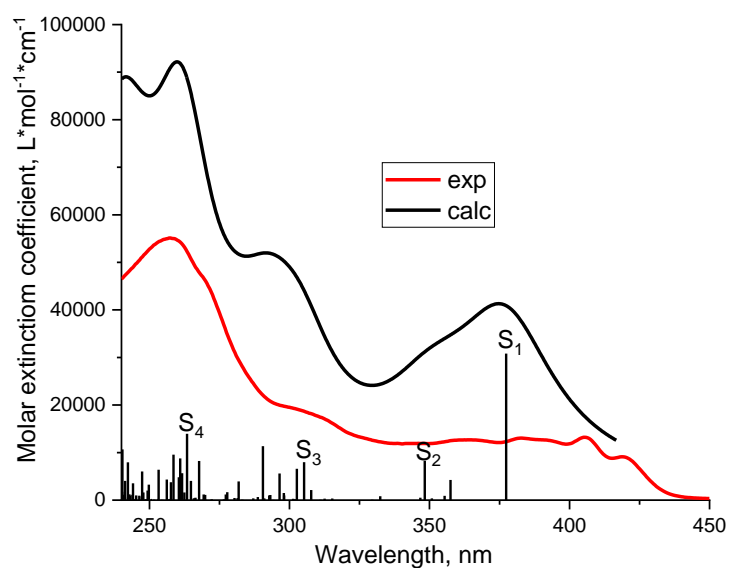

**Figure S21.** Absorption spectra of NCN-Pt-Py: experimental (red) and calculated (black) lines with oscillator strengths of electronic transitions (bars).

**Table S5.** Calculated absorption maxima ( $\lambda$ ) and oscillator strengths ( $f$ ) of NCN-Pt-Py.

| Transitions           | $\lambda$ , nm<br>(calc) | $f$<br>(calc) | Contribution of main NTO<br>pair in transition (%) |
|-----------------------|--------------------------|---------------|----------------------------------------------------|
| $S_0 \rightarrow S_4$ | 263                      | 0.28          | 46                                                 |
| $S_0 \rightarrow S_3$ | 305                      | 0.16          | 77                                                 |
| $S_0 \rightarrow S_2$ | 348                      | 0.17          | 68                                                 |
| $S_0 \rightarrow S_1$ | 377                      | 0.63          | 97                                                 |

**Table S6.** The decrease (violet) and increase (terracotta) of electron density for most intensive electronic absorption transitions of NCN-Pt-Py. The data for the corresponding interfragment charge transfer (IFCT) are given below the figures. Diagonal values represent intraligand transitions, off-diagonal values represent a charge transfer from “Donor” to “Acceptor”.

|                                                                                                                                             |          |       |       |                                                                                                                                              |          |       |       |
|---------------------------------------------------------------------------------------------------------------------------------------------|----------|-------|-------|----------------------------------------------------------------------------------------------------------------------------------------------|----------|-------|-------|
| 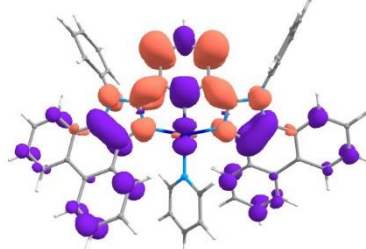 <p style="text-align: center;"><math>S_0-S_1</math></p> |          |       |       |  <p style="text-align: center;"><math>S_0-S_2</math></p> |          |       |       |
|                                                                                                                                             | Acceptor |       |       |                                                                                                                                              | Acceptor |       |       |
| Donor                                                                                                                                       | Pt       | Py    | NCN   | Donor                                                                                                                                        | Pt       | Py    | NCN   |
| Pt                                                                                                                                          | 0.001    | 0.000 | 0.061 | Pt                                                                                                                                           | 0.008    | 0.006 | 0.046 |
| Py                                                                                                                                          | 0.000    | 0.000 | 0.007 | Py                                                                                                                                           | 0.000    | 0.000 | 0.002 |
| NCN                                                                                                                                         | 0.011    | 0.000 | 0.922 | NCN                                                                                                                                          | 0.125    | 0.097 | 0.717 |

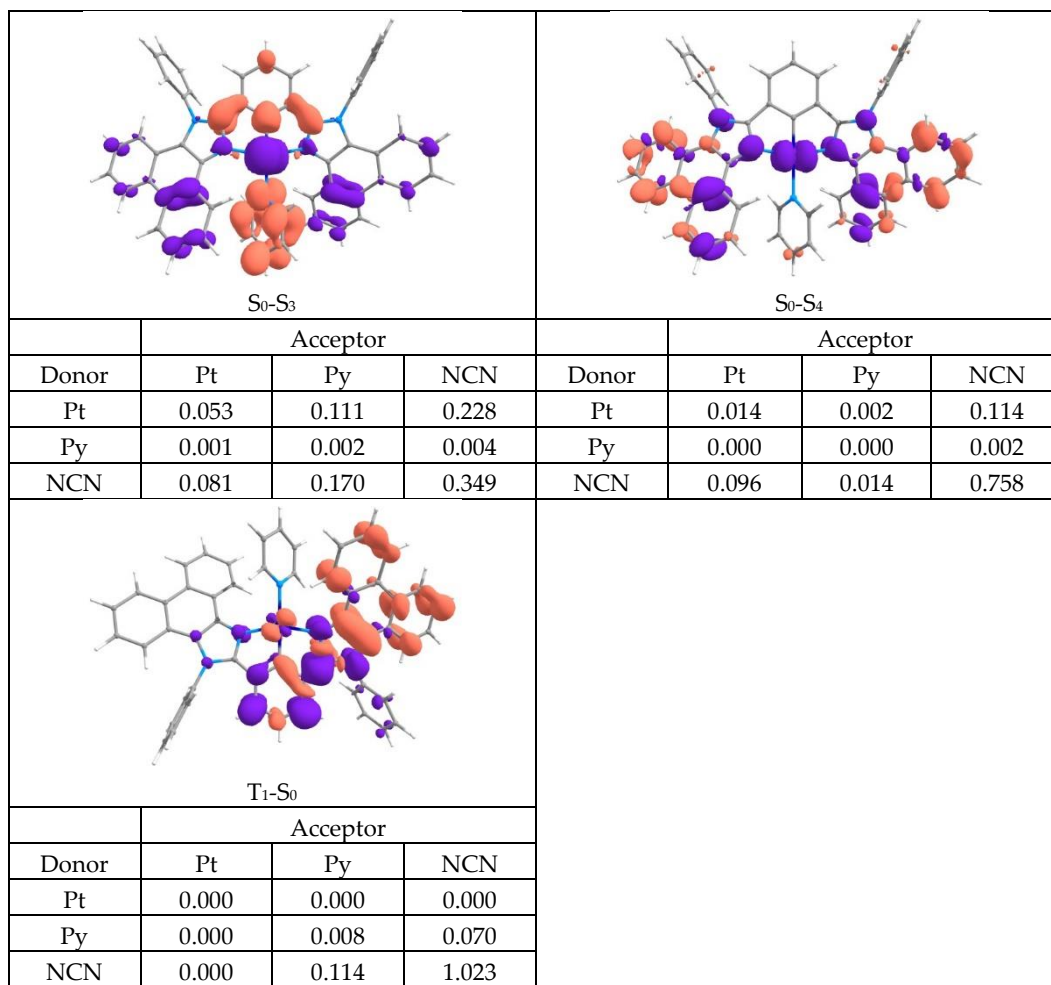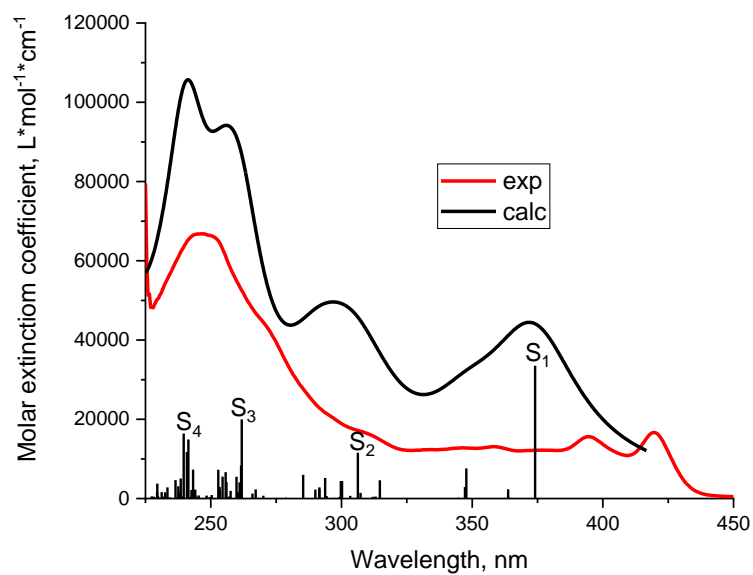

Figure S22. Absorption spectra of NCN-Pt-ACN: experimental (red) and calculated (black) lines with oscillator strengths of electronic transitions (bars).

**Table S7. Calculated absorption maxima ( $\lambda$ ) and oscillator strengths ( $f$ ) of NCN-Pt-ACN.**

| Transitions           | $\lambda$ , nm<br>(calc) | $f$<br>(calc) | Contribution of main NTO<br>pair in transition (%) |
|-----------------------|--------------------------|---------------|----------------------------------------------------|
| $S_0 \rightarrow S_4$ | 240                      | 0.33          | 43                                                 |
| $S_0 \rightarrow S_3$ | 262                      | 0.41          | 74                                                 |
| $S_0 \rightarrow S_2$ | 306                      | 0.24          | 46                                                 |
| $S_0 \rightarrow S_1$ | 374                      | 0.68          | 93                                                 |

**Table S8. The decrease (violet) and increase (terracotta) of electron density for most intensive electronic absorption transitions of NCN-Pt-ACN. The data for the corresponding interfragment charge transfer (IFCT) are given below the figures. Diagonal values represent intraligand transitions, off-diagonal values represent a charge transfer from “Donor” to “Acceptor”.**

|                                                                                     |          |       |       |                                                                                      |          |       |       |
|-------------------------------------------------------------------------------------|----------|-------|-------|--------------------------------------------------------------------------------------|----------|-------|-------|
| 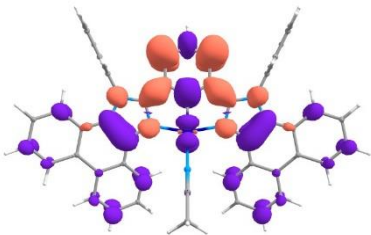   |          |       |       |    |          |       |       |
| S <sub>0</sub> -S <sub>1</sub>                                                      |          |       |       | S <sub>0</sub> -S <sub>2</sub>                                                       |          |       |       |
|                                                                                     | Acceptor |       |       |                                                                                      | Acceptor |       |       |
| Donor                                                                               | Pt       | ACN   | NCN   | Donor                                                                                | Pt       | ACN   | NCN   |
| Pt                                                                                  | 0.001    | 0.000 | 0.064 | Pt                                                                                   | 0.010    | 0.001 | 0.087 |
| ACN                                                                                 | 0.000    | 0.000 | 0.007 | ACN                                                                                  | 0.000    | 0.000 | 0.003 |
| NCN                                                                                 | 0.018    | 0.003 | 0.907 | NCN                                                                                  | 0.095    | 0.009 | 0.796 |
|  |          |       |       |  |          |       |       |
| S <sub>0</sub> -S <sub>3</sub>                                                      |          |       |       | S <sub>0</sub> -S <sub>4</sub>                                                       |          |       |       |
|                                                                                     | Acceptor |       |       |                                                                                      | Acceptor |       |       |
| Donor                                                                               | Pt       | ACN   | NCN   | Donor                                                                                | Pt       | ACN   | NCN   |
| Pt                                                                                  | 0.008    | 0.000 | 0.127 | Pt                                                                                   | 0.007    | 0.009 | 0.119 |
| ACN                                                                                 | 0.000    | 0.000 | 0.002 | ACN                                                                                  | 0.000    | 0.000 | 0.007 |
| NCN                                                                                 | 0.053    | 0.000 | 0.809 | NCN                                                                                  | 0.044    | 0.056 | 0.758 |
|  |          |       |       |                                                                                      |          |       |       |
| T <sub>1</sub> -S <sub>0</sub>                                                      |          |       |       |                                                                                      |          |       |       |
|                                                                                     | Acceptor |       |       |                                                                                      |          |       |       |
| Donor                                                                               | Pt       | ACN   | NCN   |                                                                                      |          |       |       |
| Pt                                                                                  | 0.002    | 0.000 | 0.043 |                                                                                      |          |       |       |
| ACN                                                                                 | 0.001    | 0.000 | 0.011 |                                                                                      |          |       |       |
| NCN                                                                                 | 0.049    | 0.003 | 0.892 |                                                                                      |          |       |       |



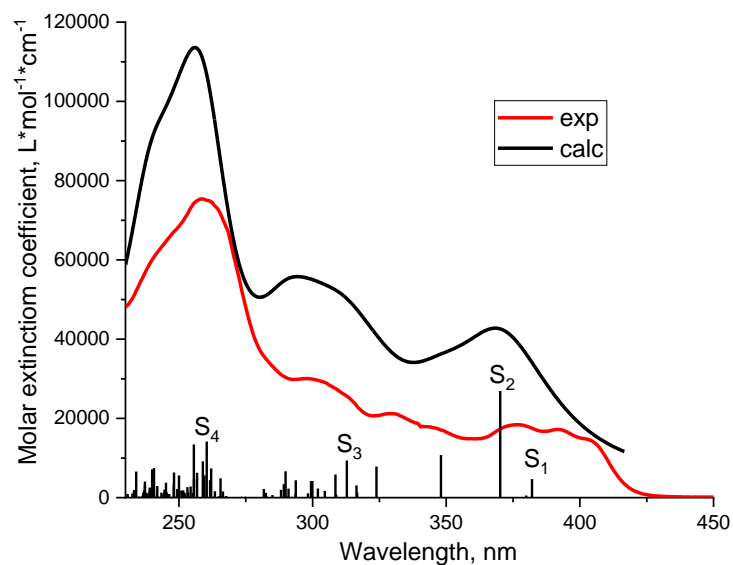

**Figure S23.** Absorption spectra of NCN-Pt-CN: experimental (red) and calculated (black) lines with oscillator strengths of electronic transitions (bars).

**Table S9.** Calculated absorption maxima ( $\lambda$ ) and oscillator strengths ( $f$ ) of NCN-Pt-CN.

| Transitions           | $\lambda$ , nm<br>(calc) | $f$<br>(calc) | Contribution of main NTO<br>pair in transition (%) |
|-----------------------|--------------------------|---------------|----------------------------------------------------|
| $S_0 \rightarrow S_4$ | 260                      | 0.29          | 42                                                 |
| $S_0 \rightarrow S_3$ | 313                      | 0.19          | 76                                                 |
| $S_0 \rightarrow S_2$ | 370                      | 0.55          | 96                                                 |
| $S_0 \rightarrow S_1$ | 382                      | 0.10          | 96                                                 |

**Table S10.** The decrease (violet) and increase (terracotta) of electron density for most intensive electronic absorption transitions of NCN-Pt-CN. The data for the corresponding interfragment charge transfer (IFCT) are given below the figures. Diagonal values represent intraligand transitions, off-diagonal values represent a charge transfer from “Donor” to “Acceptor”.

|                                                                                     |          |       |       |                                                                                      |          |       |       |
|-------------------------------------------------------------------------------------|----------|-------|-------|--------------------------------------------------------------------------------------|----------|-------|-------|
| 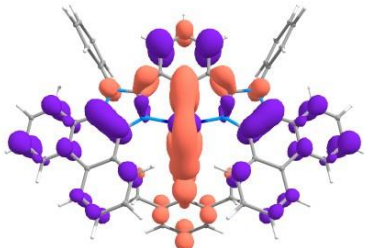 |          |       |       |  |          |       |       |
| S <sub>0</sub> -S <sub>1</sub>                                                      |          |       |       | S <sub>0</sub> -S <sub>2</sub>                                                       |          |       |       |
|                                                                                     | Acceptor |       |       |                                                                                      | Acceptor |       |       |
| Donor                                                                               | Pt       | CN    | NCN   | Donor                                                                                | Pt       | CN    | NCN   |
| Pt                                                                                  | 0.006    | 0.009 | 0.017 | Pt                                                                                   | 0.000    | 0.000 | 0.043 |
| CN                                                                                  | 0.000    | 0.000 | 0.000 | CN                                                                                   | 0.000    | 0.000 | 0.025 |
| NCN                                                                                 | 0.187    | 0.261 | 0.519 | NCN                                                                                  | 0.006    | 0.000 | 0.924 |

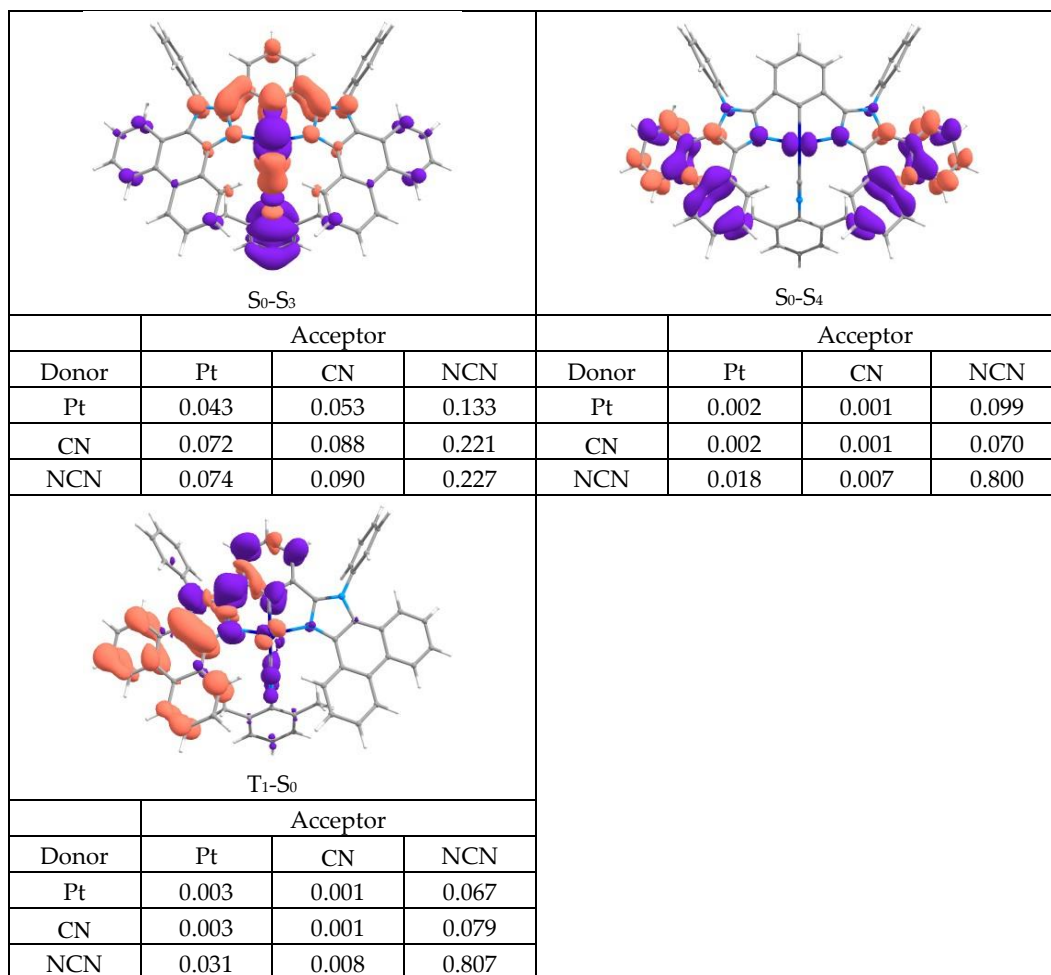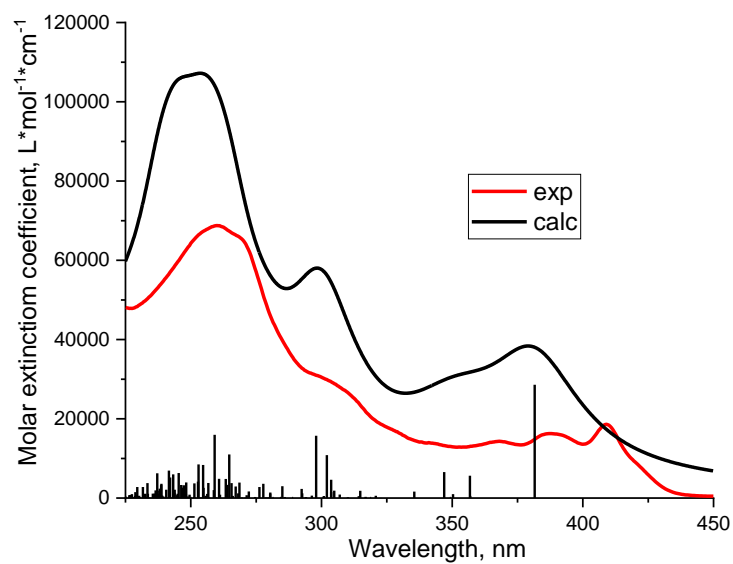

**Figure S24.** Absorption spectra of NCN-Pt-DMAP: experimental (red) and calculated (black) lines with oscillator strengths of electronic transitions (bars).

**Table S11. Calculated absorption maxima ( $\lambda$ ) and oscillator strengths ( $f$ ) of NCN-Pt-DMAP.**

| Transitions           | $\lambda$ , nm<br>(calc) | $f$<br>(calc) | Contribution of main NTO<br>pair in transition (%) |
|-----------------------|--------------------------|---------------|----------------------------------------------------|
| $S_0 \rightarrow S_4$ | 259                      | 0.32          | 43                                                 |
| $S_0 \rightarrow S_3$ | 298                      | 0.32          | 58                                                 |
| $S_0 \rightarrow S_2$ | 347                      | 0.13          | 53                                                 |
| $S_0 \rightarrow S_1$ | 382                      | 0.58          | 97                                                 |

**Table S12. The decrease (violet) and increase (terracotta) of electron density for most intensive electronic absorption transitions of NCN-Pt-DMAP. The data for the corresponding interfragment charge transfer (IFCT) are given below the figures. Diagonal values represent intraligand transitions, off-diagonal values represent a charge transfer from “Donor” to “Acceptor”.**

|                                                                                                                 |          |       |       |                                                                                                                  |          |       |       |
|-----------------------------------------------------------------------------------------------------------------|----------|-------|-------|------------------------------------------------------------------------------------------------------------------|----------|-------|-------|
| 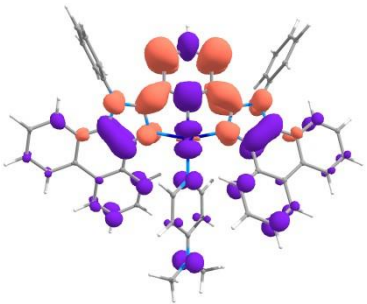 <p><math>S_0-S_1</math></p>   |          |       |       |  <p><math>S_0-S_2</math></p>   |          |       |       |
|                                                                                                                 | Acceptor |       |       |                                                                                                                  | Acceptor |       |       |
| Donor                                                                                                           | Pt       | DMAP  | NCN   | Donor                                                                                                            | Pt       | DMAP  | NCN   |
| Pt                                                                                                              | 0.001    | 0.000 | 0.085 | Pt                                                                                                               | 0.011    | 0.000 | 0.064 |
| DMAP                                                                                                            | 0.001    | 0.000 | 0.084 | DMAP                                                                                                             | 0.006    | 0.000 | 0.033 |
| NCN                                                                                                             | 0.010    | 0.000 | 0.820 | NCN                                                                                                              | 0.128    | 0.003 | 0.755 |
|  <p><math>S_0-S_3</math></p> |          |       |       |  <p><math>S_0-S_4</math></p> |          |       |       |
|                                                                                                                 | Acceptor |       |       |                                                                                                                  | Acceptor |       |       |
| Donor                                                                                                           | Pt       | DMAP  | NCN   | Donor                                                                                                            | Pt       | DMAP  | NCN   |
| Pt                                                                                                              | 0.006    | 0.003 | 0.050 | Pt                                                                                                               | 0.056    | 0.009 | 0.068 |
| DMAP                                                                                                            | 0.002    | 0.001 | 0.014 | DMAP                                                                                                             | 0.024    | 0.004 | 0.029 |
| NCN                                                                                                             | 0.096    | 0.043 | 0.786 | NCN                                                                                                              | 0.338    | 0.059 | 0.411 |
|                              |          |       |       |                                                                                                                  |          |       |       |

| T <sub>1</sub> -S <sub>0</sub> |          |       |       |
|--------------------------------|----------|-------|-------|
|                                | Acceptor |       |       |
| Donor                          | Pt       | DMAP  | NCN   |
| Pt                             | 0.003    | 0.000 | 0.042 |
| DMAP                           | 0.000    | 0.000 | 0.002 |
| NCN                            | 0.057    | 0.007 | 0.889 |
